# Supplementary material for: A UHPLC-Mass Spectrometry View of Human Melanocytic Cells Uncovers Potential Lipid Biomarkers of Melanoma
Source: MDPI journal article supplement (doi:10.3390/ijms222112061), 2021-11-08
Supplement: s1 [file s1]

# Supplementary Materials

## A UHPLC-MASS Spectrometry View of Human Melanocytic Cells Uncovers Potential Lipid Biomarkers of Melanoma

Arantza Pérez-Valle <sup>1</sup>, Beatriz Abad-García <sup>2</sup>, Olatz Fresnedo <sup>3</sup>, Gabriel Barreda-Gómez <sup>4</sup>, Patricia Aspichueta <sup>3,5</sup>, Aintzane Asumendi <sup>1,5</sup>, Egoitz Astigarraga <sup>4</sup>, José A. Fernández <sup>6</sup>, María Dolores Boyano <sup>1,5,\*</sup>, Begoña Ochoa <sup>3,\*</sup>.

- <sup>1</sup> Department of Cell Biology and Histology, Faculty of Medicine and Nursing, University of the Basque Country UPV/EHU, Leioa, Spain; [arantza.perezv@ehu.eus](mailto:arantza.perezv@ehu.eus) (A.P.-V.); [aintzane.asumendi@ehu.eus](mailto:aintzane.asumendi@ehu.eus) (A.A.); [lola.boyano@ehu.eus](mailto:lola.boyano@ehu.eus) (M.D.B.)
- <sup>2</sup> Central Analysis Service, Faculty of Science and Technology, University of the Basque Country UPV/EHU, Leioa, Spain; [beatriz.abad@ehu.eus](mailto:beatriz.abad@ehu.eus)
- <sup>3</sup> Department of Physiology, Faculty of Medicine and Nursing, University of the Basque Country UPV/EHU, Leioa, Spain; [olatz.fresnedo@ehu.eus](mailto:olatz.fresnedo@ehu.eus) (O.F.); [patricia.aspichueta@ehu.eus](mailto:patricia.aspichueta@ehu.eus) (P.A.); [begona.ochoa@ehu.eus](mailto:begona.ochoa@ehu.eus) (B.O.)
- <sup>4</sup> IMG Pharma Biotech S.L., Bizkaia Technological Park, Zamudio, Spain; [gabriel.barreda@imgpharma.com](mailto:gabriel.barreda@imgpharma.com) (G.B.); [egoitz.astigarraga@imgpharma.com](mailto:egoitz.astigarraga@imgpharma.com) (E.A.)
- <sup>5</sup> Biocruces-Bizkaia Research Institute, Cruces University Hospital, Barakaldo, Spain
- <sup>6</sup> Department of Physical Chemistry, Faculty of Science and Technology, University of the Basque Country UPV/EHU, Leioa, Spain; [josea.fernandez@ehu.eus](mailto:josea.fernandez@ehu.eus) (J.A.F.)

\* Correspondence: BO: [begona.ochoa@ehu.eus](mailto:begona.ochoa@ehu.eus); MDB: [lola.boyano@ehu.eus](mailto:lola.boyano@ehu.eus)

**Table S1. List of lipid species identified by lipidomics in melanocytic cells, along with the relative intensity in each independent sample and the corresponding peak markers (mass to charge ratio ( $m/z$ ) and retention time (RT) pairs).** Whenever possible, annotation of identified fatty acids was performed at the *sn* position-level. The ether (O) and vinyl ether (P) bonds of alkyls at the *sn*-1 position of the glycerol backbone were also characterized. HeM, human epidermal melanocytes; NM, nevi melanocytes; PM, primary melanoma; MM, metastatic melanoma. PC, phosphatidylcholine; PC(O/P), ether phosphatidylcholine; LPC, lysophosphatidylcholine; SM, sphingomyelin, Cer, ceramide; HexCer, hexosylceramide; CE, cholesteryl ester; TG, triglyceride; DG, diglyceride; PE, phosphatidylethanolamine; PE(O/P), ether phosphatidylethanolamine; LPE, lysophosphatidylethanolamine; PI, phosphatidylinositol; PG, phosphatidylglycerol; PS, phosphatidylserine; FA, fatty acid.

**Table S2. Ultra-High Performance Liquid Chromatography (UHPLC) and Mass Spectrometry (MS) settings.**

**Figure S1. Screening for lipid species with significant change in relative abundance using volcano plot analysis and heatmap clustering.** To identify lipids differentially expressed between the groups, volcano plots and heatmap clusters with fold-change > 2 and  $p$ -value  $\leq 0.05$

by Student's *t*-test using Benjamini-Hochberg as a multiple testing correction were also performed. Heatmap clustering was visualized for fold-change of potential lipid biomarkers in all ESI+ and ESI- comparisons, showing the level of relative increase (red) and decrease (blue) in peak intensity. In volcano plots, red and blue indicate up- and down-regulated species, respectively. HeM, human epidermal melanocytes; NM, nevus melanocytes; PM, primary melanoma; MM, metastatic melanoma.

**Figure S2. Relative abundance of four selected lipid species.** The relative abundance of some lipid species increases in neoplastic melanoma, as exemplified by phosphatidylcholine ethers PC O-16:0/18:1 and PC O-16:0/16:0 (A), whereas abundance of other lipids decrease markedly, as it occurs with sphingomyelin SM d18:1/16:0 and the phosphatidylethanolamine ether PE P-18:0/22:4 (B).

**Figure S3. The relative abundance of some lipid classes differ significantly among the cell groups.** Relative abundance of the total PC, PC(O), LPC, PE, PE(P), LPE, PI, PG, and PS (A), and of the total Cer+, Cer-, SM, HexCer, FA, CE, TG and DG (B). The data were estimated as the sum of the intensity values shown in Table S1 and they are expressed as the mean  $\pm$  SD. Multiple comparisons were performed by one-way ANOVA with a multiple testing correction test. The table in C shows the *p*-values for the Levene test to determine variances equivalences used to select the post-hoc method (Tukey if  $p \geq 0.05$  and Games-Howell if  $p \leq 0.05$ ), one-way ANOVA *p*-values, and Tukey's or Games-Howell's<sup>1</sup> test *p*-values for the six pairwise comparisons with the minimum significance in the comparison. \* $p \leq 0.05$ ; \*\*  $p \leq 0.01$ ; \*\*\*  $p \leq 0.001$ ; NS, not significant. The numbers highlighted in red and blue denote significant increases and decreases, respectively. HeM, human epidermal melanocytes; NM, nevus melanocytes; PM, primary melanoma; MM, metastatic melanoma.

**Figure S4. Lipid identification workflow.** (A) Fragmentation scheme of PI ions; (B) extracted ion chromatogram of [PI(18:1/20:4)-H]<sup>-</sup> in lipid extracts of human melanocytic cells samples; (C) MS/MS spectrum of [PI(18:1/20:4)+NH<sub>4</sub>]<sup>+</sup> in ESI+ and (D) of [PI(18:1/20:4)-H]<sup>-</sup> in ESI<sup>-</sup>, and (E, F) comparison of the exact masses of precursor ions and unknown lipid products with those of a database and annotation.

**Figure S5. MS/MS spectra of the precursor ions of three representative species of PC, PE, PI, PS and PG.** For PC (A) and PE (B), the intensity of the carboxylate ion peak corresponding to the FA at the *sn*-2 position was always higher than that at *sn*-1. However, the relative intensity of carboxylate product ions displayed in the MS/MS at the *sn*-1 was more intense than that at *sn*-2 fatty acyls for PI (C), PS (D) and PG (E).

**Table S1.** List of lipid species identified in the positive and negative ion mode along with their corresponding peak markers (mass to charge ratio ( $m/z$ ) and retention time (RT) pairs) and relative abundance in each independent sample.

*Note: In this file, decimals are represented by commas.*

| Lipid class                                        | Lipid species (as adduct)        | C in FA<br>No. | Double bonds<br>in FA<br>No. | Exptl $m/z$ | Exptl RT |
|----------------------------------------------------|----------------------------------|----------------|------------------------------|-------------|----------|
| <b>Positive ion mode</b>                           |                                  |                |                              |             |          |
| PC                                                 | [PC(14:0_16:1)+H] <sup>+</sup>   | 30             | 1                            | 704,5209    | 3,44     |
|                                                    | [PC(14:0_16:0)+H] <sup>+</sup>   | 30             | 0                            | 706,5414    | 3,98     |
|                                                    | [PC(17:0/14:1)+H] <sup>+</sup>   | 31             | 1                            | 718,5396    | 3,79     |
|                                                    | [PC(16:1/16:1)+H] <sup>+</sup>   | 32             | 2                            | 730,5407    | 3,60     |
|                                                    | [PC(16:0/16:1)+H] <sup>+</sup>   | 32             | 1                            | 732,5547    | 4,08     |
|                                                    | [PC(16:0/16:0)+H] <sup>+</sup>   | 32             | 0                            | 734,5680    | 4,60     |
|                                                    | [PC(16:0/18:2)+H] <sup>+</sup>   | 34             | 2                            | 758,5685    | 4,20     |
|                                                    | [PC(16:0/18:1)+H] <sup>+</sup>   | 34             | 1                            | 760,5875    | 4,66     |
|                                                    | [PC(16:0/18:0)+H] <sup>+</sup>   | 34             | 0                            | 762,6008    | 5,26     |
|                                                    | [PC(35:1)+H] <sup>+</sup>        | 35             | 1                            | 774,6017    | 4,95     |
|                                                    | [PC(16:0/20:4)+H] <sup>+</sup>   | 36             | 4                            | 782,5697    | 4,05     |
|                                                    | [PC(16:0/20:3)+H] <sup>+</sup>   | 36             | 3                            | 784,5831    | 4,32     |
|                                                    | [PC(36:2)+H] <sup>+</sup>        | 36             | 2                            | 786,6052    | 4,74     |
|                                                    | [PC(18:0/18:1)+H] <sup>+</sup>   | 36             | 1                            | 788,6176    | 5,27     |
|                                                    | [PC(16:0/22:5)+H] <sup>+</sup>   | 38             | 5                            | 808,5850    | 4,21     |
|                                                    | [PC(38:3)+H] <sup>+</sup>        | 38             | 3                            | 812,6182    | 4,92     |
|                                                    | [PC(18:0/20:2)+H] <sup>+</sup>   | 38             | 2                            | 814,6337    | 5,29     |
|                                                    | [PC(38:1)+H] <sup>+</sup>        | 38             | 1                            | 816,6492    | 5,81     |
|                                                    | [PC(40:6)+H] <sup>+</sup>        | 40             | 6                            | 834,6019    | 4,30     |
|                                                    | [PC(40:5)+H] <sup>+</sup>        | 40             | 5                            | 836,6148    | 4,69     |
|                                                    | [PC(40:4)+H] <sup>+</sup>        | 40             | 4                            | 838,6320    | 5,06     |
|                                                    | [PC(40:2)+H] <sup>+</sup>        | 40             | 2                            | 842,6666    | 5,81     |
| <i>Total PC - phosphatidylcholine -</i>            |                                  |                |                              |             |          |
| PC(O/P)                                            | [PC(O-30:0)+H] <sup>+</sup>      | 30             | 0                            | 692,5601    | 4,39     |
|                                                    | [PC(O-32:1)+H] <sup>+</sup>      | 32             | 1                            | 718,5743    | 4,48     |
|                                                    | [PC(O-16:0/16:0)+H] <sup>+</sup> | 32             | 0                            | 720,5921    | 5,02     |
|                                                    | [PC(O-16:0/18:1)+H] <sup>+</sup> | 34             | 1                            | 746,6087    | 5,08     |
|                                                    | [PC(O-36:2)+H] <sup>+</sup>      | 36             | 2                            | 772,6240    | 5,13     |
| <i>Total PC(O/P) - ether phosphatidylcholine -</i> |                                  |                |                              |             |          |
| LPC                                                | [LPC(18:1)+H] <sup>+</sup>       | 18             | 1                            | 522,3563    | 1,17     |
| <i>Total LPC - lysophosphatidylcholine -</i>       |                                  |                |                              |             |          |
| SM                                                 | [SM(d18:1/14:0)+H] <sup>+</sup>  | 32             | 1                            | 675,5428    | 3,27     |
|                                                    | [SM(d18:0/14:0)+H] <sup>+</sup>  | 32             | 0                            | 677,5562    | 3,38     |
|                                                    | [SM(d18:1/15:0)+H] <sup>+</sup>  | 33             | 1                            | 689,5615    | 3,60     |
|                                                    | [SM(d34:2)+H] <sup>+</sup>       | 34             | 2                            | 701,5585    | 3,39     |
|                                                    | [SM(d18:1/16:0)+H] <sup>+</sup>  | 34             | 1                            | 703,5790    | 3,93     |
|                                                    | [SM(d18:0/16:0)+H] <sup>+</sup>  | 34             | 0                            | 705,5837    | 3,97     |
|                                                    | [SM(d18:2/18:1)+H] <sup>+</sup>  | 36             | 3                            | 727,5742    | 2,03     |
|                                                    | [SM(d18:1/18:0)+H] <sup>+</sup>  | 36             | 1                            | 731,6078    | 4,57     |
|                                                    | [SM(d18:0/20:0)+H] <sup>+</sup>  | 38             | 0                            | 761,6558    | 5,33     |
|                                                    | [SM(d18:1/22:1)+H] <sup>+</sup>  | 40             | 2                            | 785,6613    | 5,23     |
|                                                    | [SM(d18:1/22:0)+H] <sup>+</sup>  | 40             | 1                            | 787,6701    | 5,76     |

|                                        |                          |    |   |          |      |
|----------------------------------------|--------------------------|----|---|----------|------|
|                                        | [SM(41:2)+H]+            | 41 | 2 | 799,6661 | 5,48 |
|                                        | [SM(d18:1/23:0)+H]+      | 41 | 1 | 801,6830 | 6,05 |
|                                        | [SM(d18:2/24:1)+H]+      | 42 | 3 | 811,6437 | 5,29 |
|                                        | [SM(d18:1/24:1)+H]+      | 42 | 2 | 813,6875 | 5,74 |
|                                        | [SM(d18:1/24:0)+H]+      | 42 | 1 | 815,7000 | 6,31 |
|                                        | [SM(d18:1/26:1)+H]+      | 44 | 2 | 841,7153 | 6,27 |
| <i>Total SM - sphingomyelin -</i>      |                          |    |   |          |      |
| Cer (+)                                | [Cer(d18:1/24:1)+Na]+    | 42 | 2 | 670,6082 | 6,50 |
|                                        | [Cer(d18:1/24:0)+Na]+    | 42 | 1 | 672,6248 | 6,97 |
| <i>Total Cer (+) - ceramide -</i>      |                          |    |   |          |      |
| HexCer                                 | [HexCer(d18:1/22:0)+Na]+ | 40 | 1 | 806,6603 | 5,91 |
|                                        | [HexCer(d18:1/24:1)+Na]+ | 42 | 2 | 832,6644 | 5,89 |
|                                        | [HexCer(d18:1/24:0)+Na]+ | 42 | 1 | 834,6785 | 6,39 |
| <i>Total HexCer -hexosylceramide -</i> |                          |    |   |          |      |
| CE                                     | [CE(14:1)+NH4]+          | 14 | 1 | 612,5709 | 5,92 |
|                                        | [CE(15:0)+NH4]+          | 15 | 0 | 628,5992 | 6,12 |
|                                        | [CE(16:2)+NH4]+          | 16 | 2 | 638,5806 | 5,99 |
|                                        | [CE(17:1)+NH4]+          | 17 | 1 | 654,6161 | 6,59 |
|                                        | [CE(18:1)+NH4]+          | 18 | 1 | 668,6347 | 9,14 |
|                                        | [CE(20:4)+NH4]+          | 20 | 4 | 690,6231 | 5,80 |
| <i>Total CE -cholesteryl ester -</i>   |                          |    |   |          |      |
| TG                                     | [TG(42:0)+NH4]+          | 42 | 0 | 740,6774 | 7,77 |
|                                        | [TG(44:1)+NH4]+          | 44 | 1 | 766,6961 | 7,81 |
|                                        | [TG(44:0)+NH4]+          | 44 | 0 | 768,7065 | 8,08 |
|                                        | [TG(46:2)+NH4]+          | 46 | 2 | 792,7099 | 7,86 |
|                                        | [TG(46:1)+NH4]+          | 46 | 1 | 794,7218 | 8,11 |
|                                        | [TG(46:0)+NH4]+          | 46 | 0 | 796,7408 | 8,37 |
|                                        | [TG(47:1)+NH4]+          | 47 | 1 | 808,7387 | 8,24 |
|                                        | [TG(47:0)+NH4]+          | 47 | 0 | 810,7530 | 8,48 |
|                                        | [TG(48:3)+NH4]+          | 48 | 3 | 818,7232 | 7,91 |
|                                        | [TG(48:2)+NH4]+          | 48 | 2 | 820,7400 | 8,15 |
|                                        | [TG(48:1)+NH4]+          | 48 | 1 | 822,7576 | 8,39 |
|                                        | [TG(48:0)+NH4]+          | 48 | 0 | 824,7668 | 8,60 |
|                                        | [TG(49:2)+NH4]+          | 49 | 2 | 834,7553 | 8,30 |
|                                        | [TG(49:1)+NH4]+          | 49 | 1 | 836,7702 | 8,51 |
|                                        | [TG(49:0)+NH4]+          | 49 | 0 | 838,7841 | 8,71 |
|                                        | [TG(50:4)+NH4]+          | 50 | 4 | 844,7390 | 7,99 |
|                                        | [TG(50:3)+NH4]+          | 50 | 3 | 846,7561 | 8,19 |
|                                        | [TG(50:2)+NH4]+          | 50 | 2 | 848,7715 | 8,42 |
|                                        | [TG(50:1)+NH4]+          | 50 | 1 | 850,7849 | 8,65 |
|                                        | [TG(50:0)+NH4]+          | 50 | 0 | 852,7977 | 8,80 |
|                                        | [TG(51:3)+NH4]+          | 51 | 3 | 860,7723 | 8,33 |
|                                        | [TG(51:2)+NH4]+          | 51 | 2 | 862,7866 | 8,53 |
|                                        | [TG(51:1)+NH4]+          | 51 | 1 | 864,7989 | 8,74 |
|                                        | [TG(52:6)+NH4]+          | 52 | 6 | 868,7380 |      |
|                                        | [TG(52:5)+NH4]+          | 52 | 5 | 870,7568 | 7,99 |
|                                        | [TG(52:4)+NH4]+          | 52 | 4 | 872,7720 | 8,22 |
|                                        | [TG(52:3)+NH4]+          | 52 | 3 | 874,7882 | 8,44 |
|                                        | [TG(52:2)+NH4]+          | 52 | 2 | 876,8059 | 8,66 |
|                                        | [TG(52:1)+NH4]+          | 52 | 1 | 878,8138 | 8,84 |
|                                        | [TG(52:0)+NH4]+          | 52 | 0 | 880,8299 | 9,05 |
|                                        | [TG(53:3)+NH4]+          | 53 | 3 | 888,7983 | 8,53 |

|                                              |                      |    |   |          |      |
|----------------------------------------------|----------------------|----|---|----------|------|
|                                              | [TG(53:2)+NH4]+      | 53 | 2 | 890,8117 | 8,73 |
|                                              | [TG(54:6)+NH4]+      | 54 | 6 | 896,7690 | 8,02 |
|                                              | [TG(54:5)+NH4]+      | 54 | 5 | 898,7851 | 8,24 |
|                                              | [TG(54:4)+NH4]+      | 54 | 4 | 900,8043 | 8,47 |
|                                              | [TG(54:3)+NH4]+      | 54 | 3 | 902,8141 | 8,68 |
|                                              | [TG(54:2)+NH4]+      | 54 | 2 | 904,8321 | 8,86 |
|                                              | [TG(54:1)+NH4]+      | 54 | 1 | 906,8446 | 9,05 |
|                                              | [TG(56:6)+NH4]+      | 56 | 6 | 924,8008 | 8,38 |
|                                              | [TG(56:5)+NH4]+      | 56 | 5 | 926,8162 | 8,55 |
|                                              | [TG(56:4)+NH4]+      | 56 | 4 | 928,8324 | 8,73 |
|                                              | [TG(56:3)+NH4]+      | 56 | 3 | 930,8490 | 8,89 |
|                                              | [TG(56:2)+NH4]+      | 56 | 2 | 932,8628 | 9,09 |
|                                              | [TG(56:1)+NH4]+      | 56 | 1 | 934,8772 | 9,26 |
|                                              | [TG(58:6)+NH4]+      | 58 | 6 | 952,8308 | 8,58 |
|                                              | [TG(58:5)+NH4]+      | 58 | 5 | 954,8464 | 8,77 |
|                                              | [TG(58:4)+NH4]+      | 58 | 4 | 956,8638 | 8,92 |
|                                              | [TG(58:3)+NH4]+      | 58 | 3 | 958,8792 | 9,12 |
|                                              | [TG(58:2)+NH4]+      | 58 | 2 | 960,8942 | 9,32 |
|                                              | [TG(58:1)+NH4]+      | 58 | 1 | 962,9088 | 9,50 |
|                                              | [TG(60:2)+NH4]+      | 60 | 2 | 988,9244 | 9,51 |
| <i>Total TG - triglyceride -</i>             |                      |    |   |          |      |
| DG                                           | [DG(32:1)+Na]+       | 32 | 1 | 589,5244 | 5,41 |
|                                              | [DG(32:0)+Na]+       | 32 | 0 | 591,5103 | 5,90 |
|                                              | [DG(34:1)+Na]+       | 34 | 1 | 617,5137 | 5,95 |
|                                              | [DG(34:0)+Na]+       | 34 | 0 | 619,5272 | 6,42 |
|                                              | [DG(36:2)+Na]+       | 36 | 2 | 643,5308 | 6,02 |
|                                              | [DG(36:1)+Na]+       | 36 | 1 | 645,5461 | 6,46 |
|                                              | [DG(36:0)+Na]+       | 36 | 0 | 647,4704 | 6,80 |
| <i>Total DG - diglyceride -</i>              |                      |    |   |          |      |
| <i>Negative ion mode</i>                     |                      |    |   |          |      |
| PE                                           | [PE(16:0/16:1)-H]-   | 32 | 1 | 688,4999 | 4,25 |
|                                              | [PE(34:2)-H]-        | 34 | 2 | 714,5048 | 4,32 |
|                                              | [PE(34:1)-H]-        | 34 | 1 | 716,5255 | 4,85 |
|                                              | [PE(16:0/20:4)-H]-   | 36 | 4 | 738,5086 | 4,28 |
|                                              | [PE(18:1/18:2)-H]-   | 36 | 3 | 740,5206 | 4,49 |
|                                              | [PE(18:0/18:1)-H]-   | 36 | 1 | 744,5509 | 5,43 |
|                                              | [PE(18:1/20:4)-H]-   | 38 | 5 | 764,5331 | 4,36 |
|                                              | [PE(18:1/20:3)-H]-   | 38 | 4 | 766,5422 | 4,90 |
|                                              | [PE(18:0/20:3)-H]-   | 38 | 3 | 768,5539 | 5,25 |
|                                              | [PE(18:0/20:2)-H]-   | 38 | 2 | 770,5688 | 5,48 |
|                                              | [PE(18:1/22:4)-H]-   | 40 | 5 | 792,5683 | 4,66 |
|                                              | [PE(18:0/22:4)-H]-   | 40 | 4 | 794,5681 | 5,25 |
| <i>Total PE - phosphatidylethanolamine -</i> |                      |    |   |          |      |
| PE(O/P)                                      | [PE(P-16:0/16:1)-H]- | 32 | 1 | 672,4963 | 4,59 |
|                                              | [PE(P-16:0/16:0)-H]- | 32 | 0 | 674,5109 | 5,12 |
|                                              | [PE(P-16:0/18:1)-H]- | 34 | 1 | 700,5258 | 5,17 |
|                                              | [PE(P-18:0/17:2)-H]- | 35 | 2 | 712,5252 | 4,98 |
|                                              | [PE(P-16:0/20:5)-H]- | 36 | 5 | 720,4969 | 4,20 |
|                                              | [PE(P-16:0/20:4)-H]- | 36 | 4 | 722,5110 | 4,60 |
|                                              | [PE(P-18:0/18:2)-H]- | 36 | 2 | 726,5413 | 5,23 |
|                                              | [PE(P-18:0/18:1)-H]- | 36 | 1 | 728,5565 | 5,74 |
|                                              | [PE(P-16:0/22:6)-H]- | 38 | 6 | 746,5122 | 4,42 |

|                                                        |                      |    |   |          |      |
|--------------------------------------------------------|----------------------|----|---|----------|------|
|                                                        | [PE(P-38:5)-H]-      | 38 | 5 | 748,5288 | 4,65 |
|                                                        | [PE(P-38:4)-H]-      | 38 | 4 | 750,5421 | 5,17 |
|                                                        | [PE(P-38:3)-H]-      | 38 | 3 | 752,5569 | 5,45 |
|                                                        | [PE(P-38:2)-H]-      | 38 | 2 | 754,5736 | 5,76 |
|                                                        | [PE(P-38:1)-H]-      | 38 | 1 | 756,5895 | 6,23 |
|                                                        | [PE(P-18:1/22:6)-H]- | 40 | 7 | 772,5285 | 4,50 |
|                                                        | [PE(P-18:0/22:6)-H]- | 40 | 6 | 774,5456 | 5,03 |
|                                                        | [PE(P-40:5)-H]-      | 40 | 5 | 776,5580 | 5,18 |
|                                                        | [PE(P-18:0-22:4)-H]- | 40 | 4 | 778,5733 | 5,56 |
| <i>Total PE(O/P) -ether phosphatidylethanolamine -</i> |                      |    |   |          |      |
| LPE                                                    | [LPE(16:0)-H]-       | 16 | 0 | 452,2763 | 1,10 |
|                                                        | [LPE(18:1)-H]-       | 18 | 1 | 478,2904 | 0,58 |
|                                                        | [LPE(18:0)-H]-       | 18 | 0 | 480,3087 | 1,48 |
|                                                        | [LPE(20:4)-H]-       | 20 | 4 | 500,2766 | 0,85 |
| <i>Total LPE -lysophosphatidylethanolamine -</i>       |                      |    |   |          |      |
| PI                                                     | [PI(32:1)-H]-        | 32 | 1 | 807,5026 | 3,10 |
|                                                        | [PI(16:1/18:1)-H]-   | 34 | 2 | 833,5197 | 3,18 |
|                                                        | [PI(16:1/18:0)-H]-   | 34 | 1 | 835,5326 | 3,67 |
|                                                        | [PI(16:0/20:4)-H]-   | 36 | 4 | 857,5176 | 3,14 |
|                                                        | [PI(36:3)-H]-        | 36 | 3 | 859,5326 | 3,39 |
|                                                        | [PI(18:0/18:2)-H]-   | 36 | 2 | 861,5506 | 3,75 |
|                                                        | [PI(16:0/20:1)-H]-   | 36 | 1 | 863,5633 | 4,26 |
|                                                        | [PI(18:1/20:4)-H]-   | 38 | 5 | 883,5350 | 3,24 |
|                                                        | [PI(18:0/20:4)-H]-   | 38 | 4 | 885,5518 | 3,75 |
|                                                        | [PI(18:0/20:3)-H]-   | 38 | 3 | 887,5620 | 3,93 |
|                                                        | [PI(18:0/20:2)-H]-   | 38 | 2 | 889,5792 | 4,31 |
|                                                        | [PI(40:6)-H]-        | 40 | 6 | 909,5487 | 3,59 |
|                                                        | [PI(40:5)-H]-        | 40 | 5 | 911,5645 | 3,76 |
|                                                        | [PI(40:4)-H]-        | 40 | 4 | 913,5779 | 4,14 |
|                                                        | [PI(40:3)-H]-        | 40 | 3 | 915,5961 | 4,24 |
| <i>Total PI -phosphatidylinositol -</i>                |                      |    |   |          |      |
| PG                                                     | [PG(32:0)-H]-        | 32 | 0 | 721,4996 | 4,21 |
|                                                        | [PG(18:0/16:1)-H]-   | 34 | 1 | 747,5139 | 4,47 |
|                                                        | [PG(18:0_16:0)-H]-   | 34 | 0 | 749,5321 | 4,66 |
|                                                        | [PG(18:1/18:2)-H]-   | 36 | 3 | 771,5170 | 3,13 |
|                                                        | [PG(18:1/18:1)-H]-   | 36 | 2 | 773,5329 | 4,51 |
|                                                        | [PG(36:1)-H]-        | 36 | 1 | 775,5451 | 5,04 |
|                                                        | [PG(18:1/20:2)-H]-   | 38 | 3 | 799,5449 | 3,62 |
|                                                        | [PG(18:1/22:6)-H]-   | 40 | 7 | 819,5173 | 2,88 |
| <i>Total PG -phosphatidylglycerol -</i>                |                      |    |   |          |      |
| PS                                                     | [PS(16:0/18:1)-H]-   | 34 | 1 | 760,5117 | 3,88 |
|                                                        | [PS(36:2)-H]-        | 36 | 2 | 786,5266 | 3,94 |
|                                                        | [PS(36:1)-H]-        | 36 | 1 | 788,5411 | 4,44 |
|                                                        | [PS(18:0/20:4)-H]-   | 38 | 4 | 810,5261 | 4,95 |
|                                                        | [PS(38:2)-H]-        | 38 | 2 | 814,5586 | 4,50 |
|                                                        | [PS(38:1)-H]-        | 38 | 1 | 816,5735 | 4,25 |
|                                                        | [PS(18:0/22:2)-H]-   | 40 | 2 | 842,5904 | 4,37 |
|                                                        | [PS(18:0/22:1)-H]-   | 40 | 1 | 844,6074 | 4,80 |
| <i>Total PS -phosphatidylserine -</i>                  |                      |    |   |          |      |
| Cer                                                    | [Cer(d18:1/16:0)-H]- | 34 | 1 | 536,5073 | 4,86 |
|                                                        | [Cer(d18:1/18:1)-H]- | 36 | 2 | 562,5230 | 5,00 |

|                                   |                      |    |   |          |      |
|-----------------------------------|----------------------|----|---|----------|------|
|                                   | [Cer(d18:1/18:0)-H]- | 36 | 1 | 564,5353 | 5,46 |
|                                   | [Cer(d18:2/22:0)-H]- | 40 | 2 | 618,5809 | 6,05 |
|                                   | [Cer(d18:1/22:0)-H]- | 40 | 1 | 620,5964 | 6,52 |
|                                   | [Cer(d18:1/24:0)-H]- | 42 | 1 | 648,6301 | 6,97 |
| <i>Total Cer (-) - ceramide -</i> |                      |    |   |          |      |
| FA                                | [FA(14:0)-H]-        | 14 | 0 | 227,2029 | 1,13 |
|                                   | [FA(15:0)-H]-        | 15 | 0 | 241,2150 | 1,31 |
|                                   | [FA(16:1)-H]-        | 16 | 1 | 253,2172 | 1,23 |
|                                   | [FA(16:0)-H]-        | 16 | 0 | 255,2331 | 1,57 |
|                                   | [FA(17:1)-H]-        | 17 | 1 | 267,2318 | 1,45 |
|                                   | [FA(17:0)-H]-        | 17 | 0 | 269,2466 | 1,82 |
|                                   | [FA(18:2)-H]-        | 18 | 2 | 279,2350 | 1,33 |
|                                   | [FA(18:1)-H]-        | 18 | 1 | 281,2496 | 1,67 |
|                                   | [FA(18:0)-H]-        | 18 | 0 | 283,2635 | 2,17 |
|                                   | [FA(19:1)-H]-        | 19 | 1 | 295,2640 | 1,96 |
|                                   | [FA(19:0)-H]-        | 19 | 0 | 297,2789 | 2,49 |
|                                   | [FA(20:4)-H]-        | 20 | 4 | 303,2335 | 1,24 |
|                                   | [FA(20:3)-H]-        | 20 | 3 | 305,2482 | 1,52 |
|                                   | [FA(20:2)-H]-        | 20 | 2 | 307,2624 | 1,82 |
|                                   | [FA(20:1)-H]-        | 20 | 1 | 309,2815 | 2,26 |
|                                   | [FA(20:0)-H]-        | 20 | 0 | 311,2934 | 2,90 |
|                                   | [FA(21:0)-H]-        | 21 | 0 | 325,3097 | 3,25 |
|                                   | [FA(22:6)-H]-        | 22 | 6 | 327,2320 | 1,12 |
|                                   | [FA(22:5)-H]-        | 22 | 5 | 329,2466 | 1,32 |
|                                   | [FA(22:4)-H]-        | 22 | 4 | 331,2637 | 1,62 |
|                                   | [FA(22:3)-H]-        | 22 | 3 | 333,2795 | 2,01 |
|                                   | [FA(22:2)-H]-        | 22 | 2 | 335,2944 | 2,43 |
|                                   | [FA(22:1)-H]-        | 22 | 1 | 337,3101 | 2,96 |
|                                   | [FA(22:0)-H]-        | 22 | 0 | 339,3245 | 3,69 |
| <i>Total FA -fatty acid-</i>      |                      |    |   |          |      |

| HeM     | HeM     | HeM     | HeM     | Skin melanocytes |         | NM      | NM      |
|---------|---------|---------|---------|------------------|---------|---------|---------|
| HeMn-LP | HeMn-DP | HeMn-DP | HeMn-MP | Mean             | % Class | N6 (P7) | N1 (P4) |
|         |         |         |         |                  |         |         |         |
| 34563   | 36762   | 61770   | 59356   | 48113            | 0,7     | 25393   | 9789    |
| 305109  | 341630  | 295363  | 440589  | 345673           | 5,0     | 151646  | 42985   |
| 47165   | 47168   | 46947   | 65099   | 51595            | 0,8     | 44143   | 39034   |
| 34789   | 82254   | 134078  | 123857  | 93745            | 1,4     | 37698   | 19857   |
| 670093  | 935657  | 934266  | 1183635 | 930912           | 13,6    | 443362  | 175176  |
| 286199  | 460069  | 401851  | 615088  | 440802           | 6,4     | 273559  | 90810   |
| 536326  | 782656  | 1042423 | 1305489 | 916724           | 13,4    | 342327  | 156796  |
| 1879978 | 1929801 | 1702190 | 2100044 | 1903003          | 27,8    | 1413131 | 1093357 |
| 17228   | 34439   | 26253   | 41829   | 29937            | 0,4     | 31566   | 21946   |
| 19334   | 11894   | 9464    | 20333   | 15256            | 0,2     | 15958   | 23042   |
| 27818   | 36045   | 32486   | 45732   | 35520            | 0,5     | 33528   | 36062   |
| 199282  | 202201  | 222596  | 374743  | 249705           | 3,6     | 79753   | 39395   |
| 1139260 | 1352591 | 1092167 | 1647948 | 1307992          | 19,1    | 477243  | 341178  |
| 223323  | 416381  | 256494  | 420405  | 329151           | 4,8     | 290626  | 707077  |
| 41880   | 43331   | 30567   | 64683   | 45115            | 0,7     | 39283   | 45820   |
| 24642   | 56974   | 53003   | 79440   | 53515            | 0,8     | 46320   | 40798   |
| 31307   | 32372   | 18650   | 33424   | 28938            | 0,4     | 19379   | 11672   |
| 2372    | 6207    | 1945    | 14172   | 6174             | 0,1     | 3061    | 2302    |
| 5942    | 6967    | 3529    | 7157    | 5899             | 0,1     | 6271    | 4864    |
| 5537    | 7346    | 6066    | 8908    | 6964             | 0,1     | 7004    | 7301    |
| 2739    | 11737   | 11218   | 13352   | 9762             | 0,1     | 6409    | 5162    |
| 2286    | 2262    | 2061    | 4891    | 2875             | 0,0     | 2038    | 1217    |
| 5537174 | 6836743 | 6385387 | 8670175 | 6857370          | 100,0   | 3789699 | 2915639 |
| 10828   | 7222    | 6854    | 9236    | 8535             | 4,1     | 3369    | 1036    |
| 33123   | 19046   | 31736   | 34154   | 29515            | 14,0    | 5964    | 3244    |
| 22739   | 33959   | 27810   | 39840   | 31087            | 14,8    | 6625    | 2547    |
| 97733   | 138525  | 96141   | 151702  | 121025           | 57,5    | 17501   | 13630   |
| 18008   | 20248   | 16042   | 26360   | 20165            | 9,6     | 3400    | 2275    |
| 182431  | 219001  | 178583  | 261292  | 210327           | 100,0   | 36859   | 22731   |
| 1       | 2828    | 843     | 743     | 1232             |         | 554     | 751     |
|         |         |         |         | 1232             | 100,0   |         |         |
| 20439   | 9708    | 17885   | 20391   | 17106            | 2,2     | 9869    | 6056    |
| 3653    | 1654    | 2832    | 5606    | 3436             | 0,4     | 1324    | 1012    |
| 2233    | 1621    | 1457    | 2866    | 2044             | 0,3     | 3380    | 3083    |
| 3724    | 3672    | 5126    | 10740   | 5815             | 0,7     | 9402    | 8536    |
| 382108  | 295780  | 331967  | 433695  | 360888           | 46,4    | 267529  | 180613  |
| 43560   | 31970   | 38573   | 98447   | 53138            | 6,8     | 21649   | 17402   |
| 7149    | 6116    | 8036    | 6815    | 7029             | 0,9     | 5563    | 6179    |
| 39975   | 59504   | 49724   | 34992   | 46049            | 5,9     | 7553    | 10406   |
| 873     | 1615    | 1207    | 2247    | 1486             | 0,2     | 401     | 643     |
| 13494   | 12755   | 16664   | 21911   | 16206            | 2,1     | 7633    | 8397    |
| 11154   | 11413   | 11064   | 14061   | 11923            | 1,5     | 18930   | 19146   |



|        |         |        |        |        |       |        |        |
|--------|---------|--------|--------|--------|-------|--------|--------|
| 6917   | 3988    | 4979   | 7574   | 5865   | 0,8   | 6198   | 6792   |
| 1157   | 1632    | 946    | 1048   | 1196   | 0,2   | 2751   | 2763   |
| 15290  | 18318   | 24618  | 49291  | 26880  | 3,5   | 27521  | 19532  |
| 188297 | 209023  | 180801 | 247092 | 206303 | 26,5  | 146533 | 92827  |
| 9647   | 9402    | 7108   | 11053  | 9303   | 1,2   | 44458  | 27638  |
| 2082   | 2699    | 2976   | 2946   | 2676   | 0,3   | 3336   | 1151   |
| 751753 | 680869  | 705964 | 970774 | 777340 | 100,0 | 584030 | 412176 |
| 7321   | 11019   | 10854  | 9663   | 9714   | 84,9  | 5850   | 8076   |
| 1430   | 1855    | 1836   | 1766   | 1722   | 15,1  | 4220   | 5364   |
| 8751   | 12874   | 12690  | 11429  | 11436  | 100,0 | 10070  | 13440  |
| 8083   | 7094    | 8448   | 7549   | 7793   | 13,1  | 1911   | 5909   |
| 33198  | 44204   | 37555  | 37049  | 38002  | 63,9  | 7487   | 14657  |
| 10623  | 16268   | 13335  | 14511  | 13684  | 23,0  | 9271   | 14019  |
| 51904  | 67566   | 59338  | 59109  | 59479  | 100,0 | 18669  | 34586  |
| 1180   | 2810    | 1268   | 1469   | 1682   | 14,2  | 298    | 470    |
| 2841   | 3297    | 3320   | 5309   | 3692   | 31,2  | 2445   | 4364   |
| 1273   | 4657    | 1496   | 2197   | 2406   | 20,3  | 397    | 400    |
| 606    | 639     | 610    | 593    | 612    | 5,2   | 593    | 836    |
| 314    | 261     | 302    | 674    | 388    | 3,3   | 280    | 396    |
| 4125   | 1404    | 4876   | 1880   | 3071   | 25,9  | 2302   | 2086   |
| 10338  | 13068   | 11872  | 12122  | 11850  | 100,0 | 6315   | 8553   |
| 2383   | 2828    | 1440   | 1919   | 2142   | 0,1   | 1076   | 1233   |
| 3264   | 11183   | 5216   | 2539   | 5550   | 0,2   | 948    | 1951   |
| 6195   | 11218   | 4689   | 3765   | 6467   | 0,2   | 2137   | 2394   |
| 4627   | 31725   | 13923  | 5756   | 14008  | 0,4   | 1582   | 3671   |
| 15660  | 92330   | 29356  | 15129  | 38119  | 1,1   | 3390   | 7614   |
| 12481  | 35743   | 13605  | 9911   | 17935  | 0,5   | 4838   | 5825   |
| 6059   | 6980    | 5726   | 4791   | 5889   | 0,2   | 2330   | 3985   |
| 8450   | 5709    | 5393   | 5508   | 6265   | 0,2   | 3949   | 4237   |
| 3627   | 37457   | 21497  | 5614   | 17049  | 0,5   | 1541   | 3827   |
| 27317  | 263121  | 98119  | 27695  | 104063 | 2,9   | 5279   | 11165  |
| 54306  | 255213  | 79796  | 41589  | 107726 | 3,0   | 9633   | 16723  |
| 21570  | 54310   | 24613  | 19882  | 30094  | 0,8   | 11931  | 13640  |
| 4999   | 9713    | 6100   | 4446   | 6315   | 0,2   | 1998   | 3885   |
| 8571   | 11438   | 7685   | 6953   | 8662   | 0,2   | 3075   | 5801   |
| 5713   | 4770    | 3876   | 3534   | 4473   | 0,1   | 2579   | 3069   |
| 3171   | 29532   | 18536  | 5143   | 14096  | 0,4   | 1601   | 4242   |
| 27097  | 303740  | 182197 | 47749  | 140196 | 3,9   | 9916   | 18416  |
| 159470 | 822939  | 416570 | 188537 | 396879 | 11,1  | 39228  | 68782  |
| 83916  | 334303  | 142012 | 101940 | 165543 | 4,6   | 30894  | 47681  |
| 17581  | 48538   | 22886  | 22350  | 27839  | 0,8   | 13532  | 15123  |
| 3475   | 7755    | 4619   | 3253   | 4776   | 0,1   | 1449   | 2760   |
| 8770   | 16790   | 8506   | 6604   | 10167  | 0,3   | 2663   | 5773   |
| 7003   | 10967   | 6438   | 6236   | 7661   | 0,2   | 2518   | 4398   |
| 5205   | 7190    | 6935   | 4933   | 6066   | 0,2   | 4630   | 4597   |
| 17132  | 37645   | 33344  | 19647  | 26942  | 0,8   | 14849  | 16974  |
| 42134  | 216428  | 164689 | 65014  | 122066 | 3,4   | 29128  | 38767  |
| 166244 | 1053686 | 631243 | 293917 | 536272 | 15,0  | 53631  | 87357  |
| 286967 | 989372  | 490194 | 326595 | 523282 | 14,6  | 62091  | 122659 |
| 49635  | 240748  | 84519  | 61957  | 109215 | 3,0   | 19433  | 32862  |
| 6236   | 22068   | 10130  | 9469   | 11976  | 0,3   | 7140   | 7716   |
| 5932   | 22407   | 9711   | 10280  | 12083  | 0,3   | 2885   | 6214   |

|         |         |         |         |         |       |        |        |
|---------|---------|---------|---------|---------|-------|--------|--------|
| 10457   | 22048   | 13482   | 11600   | 14397   | 0,4   | 4739   | 8445   |
| 12890   | 23861   | 21251   | 14072   | 18018   | 0,5   | 10517  | 12216  |
| 22088   | 69720   | 59375   | 28844   | 45007   | 1,3   | 14405  | 18337  |
| 55676   | 329656  | 220616  | 116517  | 180617  | 5,0   | 27067  | 35749  |
| 206410  | 713935  | 468183  | 396833  | 446340  | 12,5  | 54037  | 105583 |
| 64089   | 309012  | 122442  | 116873  | 153104  | 4,3   | 20576  | 42999  |
| 8948    | 40470   | 13708   | 22948   | 21518   | 0,6   | 4730   | 8315   |
| 7559    | 22432   | 13553   | 7638    | 12795   | 0,4   | 1510   | 4249   |
| 8582    | 77533   | 44729   | 18704   | 37387   | 1,0   | 2643   | 5875   |
| 8371    | 115937  | 52089   | 27437   | 50958   | 1,4   | 4006   | 7675   |
| 12634   | 102276  | 38895   | 31303   | 46277   | 1,3   | 3537   | 6954   |
| 5666    | 32405   | 17665   | 11164   | 16725   | 0,5   | 2512   | 4082   |
| 2041    | 5646    | 2444    | 2549    | 3170    | 0,1   | 1085   | 1580   |
| 3233    | 11540   | 6556    | 4402    | 6433    | 0,2   | 742    | 1297   |
| 2229    | 30770   | 13348   | 7522    | 13467   | 0,4   | 1073   | 1889   |
| 1569    | 20522   | 8644    | 5491    | 9056    | 0,3   | 862    | 1429   |
| 2549    | 19091   | 7397    | 5284    | 8580    | 0,2   | 946    | 1818   |
| 1987    | 9203    | 5822    | 3159    | 5043    | 0,1   | 1183   | 1525   |
| 1160    | 4965    | 1209    | 1316    | 2162    | 0,1   | 993    | 958    |
| 854     | 4851    | 1500    | 1546    | 2188    | 0,1   | 663    | 948    |
| 1514185 | 6963720 | 3686470 | 2167857 | 3583058 | 100,0 | 509698 | 845265 |
| 10066   | 18592   | 15831   | 14464   | 14738   | 9,1   | 16834  | 4307   |
| 5105    | 8057    | 9427    | 8212    | 7700    | 4,8   | 9068   | 5691   |
| 14333   | 28969   | 15262   | 19635   | 19549   | 12,1  | 5841   | 4509   |
| 8722    | 11662   | 8528    | 11967   | 10220   | 6,3   | 13108  | 16076  |
| 17704   | 38908   | 19901   | 27236   | 25937   | 16,0  | 5161   | 4157   |
| 4438    | 7644    | 3571    | 6712    | 5591    | 3,5   | 3368   | 3344   |
| 47573   | 87817   | 84698   | 93078   | 78292   | 48,3  | 53649  | 82194  |
| 107941  | 201648  | 157219  | 181303  | 162028  | 100,0 | 107029 | 120277 |
|         |         |         |         |         |       |        |        |
| 15133   | 16023   | 16947   | 19426   | 16882   | 4,9   | 7020   | 3165   |
| 40939   | 39590   | 69504   | 62200   | 53058   | 15,3  | 10959  | 3685   |
| 35678   | 41402   | 47931   | 48971   | 43495   | 12,6  | 29155  | 12315  |
| 2105    | 3816    | 4449    | 5418    | 3947    | 1,1   | 4847   | 1854   |
| 13750   | 15087   | 21044   | 21682   | 17891   | 5,2   | 5662   | 1979   |
| 63591   | 96243   | 77838   | 103756  | 85357   | 24,7  | 45492  | 37317  |
| 21924   | 24323   | 24239   | 23439   | 23481   | 6,8   | 18288  | 10613  |
| 12886   | 21254   | 23362   | 28026   | 21382   | 6,2   | 21445  | 19617  |
| 10293   | 45330   | 46085   | 48841   | 37637   | 10,9  | 20348  | 9664   |
| 15179   | 20800   | 16641   | 22145   | 18691   | 5,4   | 9428   | 3701   |
| 9942    | 13274   | 12660   | 17135   | 13253   | 3,8   | 8502   | 7518   |
| 7240    | 13495   | 11651   | 12259   | 11161   | 3,2   | 3695   | 2372   |
| 248662  | 350636  | 372350  | 413297  | 346236  | 100,0 | 184843 | 113799 |
| 7678    | 2043    | 7016    | 6304    | 5760    | 1,7   | 2615   | 752    |
| 3060    | 1503    | 2751    | 4142    | 2864    | 0,8   | 1385   | 719    |
| 85594   | 28575   | 76865   | 81533   | 68142   | 19,9  | 22354  | 15663  |
| 1433    | 360     | 721     | 776     | 823     | 0,2   | 584    | 501    |
| 1631    | 523     | 1242    | 1659    | 1264    | 0,4   | 1650   | 880    |
| 18795   | 9475    | 25634   | 33037   | 21735   | 6,3   | 21422  | 13432  |
| 79329   | 37439   | 50979   | 51852   | 54900   | 16,0  | 14798  | 8403   |
| 17273   | 5073    | 15108   | 13785   | 12810   | 3,7   | 10889  | 7885   |
| 7046    | 3339    | 7553    | 11897   | 7459    | 2,2   | 5669   | 3280   |

|        |        |        |        |        |       |        |        |
|--------|--------|--------|--------|--------|-------|--------|--------|
| 33743  | 19058  | 44566  | 71224  | 42148  | 12,3  | 15113  | 12010  |
| 16826  | 20679  | 54245  | 52048  | 35949  | 10,5  | 32050  | 28319  |
| 5518   | 16084  | 52310  | 32536  | 26612  | 7,8   | 12754  | 7687   |
| 8469   | 5911   | 20522  | 13264  | 12041  | 3,5   | 3549   | 1905   |
| 3706   | 1532   | 5194   | 5034   | 3866   | 1,1   | 1322   | 785    |
| 9510   | 2713   | 9839   | 11746  | 8452   | 2,5   | 3646   | 2278   |
| 3551   | 1889   | 3854   | 7728   | 4255   | 1,2   | 4555   | 3780   |
| 10158  | 5677   | 15576  | 21603  | 13254  | 3,9   | 4760   | 3168   |
| 3855   | 12265  | 37680  | 28249  | 20512  | 6,0   | 4455   | 2981   |
| 317173 | 174140 | 431654 | 448418 | 342846 | 100,0 | 163572 | 114426 |
| 1208   | 9252   | 348    | 429    | 2809   | 13,8  | 782    | 444    |
| 2064   | 16579  | 622    | 696    | 4990   | 24,4  | 1084   | 979    |
| 1944   | 4485   | 1785   | 2148   | 2591   | 12,7  | 2818   | 3223   |
| 2096   | 36309  | 651    | 1049   | 10026  | 49,1  | 1527   | 882    |
| 7313   | 66625  | 3406   | 4323   | 20417  | 100,0 | 6211   | 5529   |
| 1817   | 2438   | 2075   | 2495   | 2206   | 0,9   | 1768   | 1762   |
| 13246  | 22411  | 18458  | 25825  | 19985  | 8,4   | 5911   | 4815   |
| 10756  | 10288  | 7020   | 13445  | 10377  | 4,3   | 10496  | 10243  |
| 2136   | 2649   | 2638   | 2624   | 2512   | 1,1   | 2076   | 1929   |
| 7426   | 8606   | 9413   | 9434   | 8720   | 3,6   | 3303   | 2308   |
| 38213  | 34821  | 26416  | 39827  | 34819  | 14,6  | 11707  | 8325   |
| 21450  | 15841  | 13281  | 29959  | 20133  | 8,4   | 10730  | 9967   |
| 20407  | 18752  | 11957  | 19723  | 17710  | 7,4   | 8116   | 6404   |
| 43651  | 54877  | 43468  | 59556  | 50388  | 21,1  | 27816  | 25846  |
| 14616  | 49591  | 60307  | 51865  | 44095  | 18,4  | 17240  | 10017  |
| 9301   | 17149  | 20202  | 21109  | 16940  | 7,1   | 5598   | 2159   |
| 1410   | 1306   | 1016   | 1813   | 1387   | 0,6   | 1668   | 1221   |
| 2540   | 2253   | 2076   | 3376   | 2561   | 1,1   | 1801   | 1407   |
| 2094   | 2885   | 2387   | 2819   | 2546   | 1,1   | 1438   | 1023   |
| 2681   | 5445   | 5168   | 5768   | 4766   | 2,0   | 2964   | 2558   |
| 191745 | 249311 | 225883 | 289638 | 239144 | 100,0 | 112633 | 89983  |
| 913    | 363    | 578    | 896    | 688    | 1,7   | 896    | 469    |
| 2810   | 1046   | 2209   | 3634   | 2425   | 6,1   | 2152   | 1231   |
| 15181  | 8824   | 20406  | 31611  | 19005  | 47,5  | 7347   | 5800   |
| 4719   | 5280   | 4528   | 5221   | 4937   | 12,3  | 1457   | 1375   |
| 4519   | 1430   | 4873   | 5877   | 4175   | 10,4  | 1710   | 1257   |
| 1957   | 922    | 1997   | 3510   | 2097   | 5,2   | 2314   | 1471   |
| 2643   | 6117   | 5342   | 6334   | 5109   | 12,8  | 1621   | 1462   |
| 1280   | 1361   | 1623   | 1918   | 1546   | 3,9   | 2522   | 3610   |
| 34021  | 25342  | 41556  | 59002  | 39980  | 100,0 | 20018  | 16675  |
| 6098   | 14681  | 12708  | 12497  | 11496  | 5,9   | 11412  | 4094   |
| 25374  | 23658  | 22732  | 25149  | 24228  | 12,4  | 8213   | 3050   |
| 90535  | 135809 | 95020  | 105009 | 106593 | 54,6  | 81904  | 61215  |
| 5579   | 5079   | 5252   | 4766   | 5169   | 2,6   | 4002   | 2706   |
| 7708   | 10738  | 8821   | 11188  | 9614   | 4,9   | 5716   | 2263   |
| 12646  | 14395  | 15969  | 16909  | 14980  | 7,7   | 10447  | 8279   |
| 3844   | 3590   | 4392   | 4302   | 4032   | 2,1   | 2686   | 1945   |
| 19921  | 18315  | 18265  | 20538  | 19260  | 9,9   | 13214  | 10885  |
| 171705 | 226265 | 183160 | 200358 | 195372 | 100,0 | 137593 | 94437  |
| 67247  | 53381  | 82144  | 86542  | 72329  | 67,6  | 18029  | 33491  |
| 3322   | 5065   | 5405   | 5431   | 4806   | 4,5   | 2296   | 1407   |

|         |         |         |         |         |       |         |         |
|---------|---------|---------|---------|---------|-------|---------|---------|
| 11288   | 18400   | 21763   | 13395   | 16212   | 15,2  | 2570    | 4507    |
| 3686    | 3882    | 4044    | 4932    | 4136    | 3,9   | 1476    | 2757    |
| 2595    | 2998    | 2983    | 3002    | 2895    | 2,7   | 2788    | 6730    |
| 5566    | 6351    | 4711    | 9813    | 6610    | 6,2   | 14207   | 18834   |
| 93704   | 90079   | 121049  | 123116  | 106987  | 100,0 | 41367   | 67726   |
| 64427   | 62118   | 45049   | 43629   | 53806   | 1,0   | 79602   | 66050   |
| 78288   | 27368   | 29036   | 24171   | 39715   | 0,7   | 85873   | 45074   |
| 110395  | 211297  | 152397  | 141866  | 153989  | 2,8   | 49943   | 58944   |
| 1403846 | 1204387 | 1493732 | 819599  | 1230391 | 22,7  | 1646872 | 1679505 |
| 26929   | 11782   | 14607   | 10491   | 15952   | 0,3   | 14800   | 17612   |
| 117467  | 37203   | 45565   | 46058   | 61573   | 1,1   | 77497   | 85995   |
| 68364   | 130332  | 114097  | 87404   | 100049  | 1,8   | 38332   | 43625   |
| 1264280 | 1930495 | 985268  | 1595528 | 1443893 | 26,7  | 376580  | 436375  |
| 1259774 | 1916801 | 3037342 | 1257738 | 1867914 | 34,5  | 2170107 | 2565467 |
| 10190   | 6136    | 3438    | 7528    | 6823    | 0,1   | 3199    | 6460    |
| 41459   | 16115   | 17033   | 12144   | 21688   | 0,4   | 20713   | 25580   |
| 94033   | 37821   | 16755   | 32704   | 45328   | 0,8   | 43103   | 77525   |
| 19848   | 185296  | 104052  | 102401  | 102899  | 1,9   | 24246   | 19115   |
| 16412   | 75799   | 39987   | 59589   | 47947   | 0,9   | 10481   | 7307    |
| 39258   | 76819   | 30039   | 63745   | 52465   | 1,0   | 11337   | 9712    |
| 60130   | 41201   | 62010   | 30787   | 48532   | 0,9   | 48866   | 77219   |
| 22396   | 8415    | 7427    | 6308    | 11136   | 0,2   | 9537    | 21510   |
| 5296    | 3861    | 1568    | 6019    | 4186    | 0,1   | 3228    | 4601    |
| 18358   | 6039    | 3462    | 9223    | 9271    | 0,2   | 4930    | 4673    |
| 20720   | 13095   | 7404    | 15174   | 14098   | 0,3   | 5282    | 6309    |
| 2777    | 41264   | 15277   | 20281   | 19900   | 0,4   | 5530    | 3751    |
| 4611    | 12956   | 6305    | 9503    | 8344    | 0,2   | 2384    | 1493    |
| 8588    | 13489   | 6340    | 11590   | 10002   | 0,2   | 2977    | 3147    |
| 71473   | 42998   | 35876   | 22185   | 43133   | 0,8   | 32163   | 91688   |
| 4829319 | 6113088 | 6274065 | 4435662 | 5413034 | 100,0 | 4767581 | 5358736 |

| NM      | NM      | NM      | NM      | NM      | NM      | Nevi melanocytes |         |  |
|---------|---------|---------|---------|---------|---------|------------------|---------|--|
| N6 (P9) | N4 (P5) | N3 (P4) | N3 (P6) | N2 (P4) | N2 (P5) | Mean             | % Class |  |
| 24525   | 13070   | 13579   | 32583   | 59075   | 129205  | 38402            | 0,8     |  |
| 151684  | 85524   | 106024  | 233423  | 143126  | 303463  | 152234           | 3,2     |  |
| 55792   | 36103   | 54872   | 67000   | 47967   | 56174   | 50136            | 1,0     |  |
| 42840   | 19811   | 33138   | 77133   | 106467  | 274444  | 76423            | 1,6     |  |
| 407343  | 246571  | 315981  | 648656  | 682135  | 1185228 | 513056           | 10,7    |  |
| 291857  | 116827  | 290975  | 432850  | 159685  | 343943  | 250063           | 5,2     |  |
| 394653  | 294149  | 252874  | 549398  | 743141  | 1442250 | 521949           | 10,9    |  |
| 1412189 | 1191374 | 1381686 | 2019000 | 1317606 | 2161282 | 1498703          | 31,3    |  |
| 38768   | 9168    | 48469   | 75891   | 20373   | 54197   | 37547            | 0,8     |  |
| 35045   | 6365    | 25615   | 52039   | 6551    | 10947   | 21945            | 0,5     |  |
| 39074   | 16999   | 72818   | 94395   | 36732   | 76533   | 50768            | 1,1     |  |
| 120857  | 91036   | 66306   | 121674  | 196418  | 440135  | 144447           | 3,0     |  |
| 750100  | 970939  | 602288  | 950477  | 558988  | 1164937 | 727019           | 15,2    |  |
| 480411  | 131405  | 693059  | 1060245 | 165529  | 426754  | 494388           | 10,3    |  |
| 57835   | 15346   | 145824  | 183649  | 24311   | 67015   | 72386            | 1,5     |  |
| 67919   | 31878   | 47674   | 89722   | 68156   | 202560  | 74378            | 1,6     |  |
| 23673   | 15945   | 12087   | 25989   | 12806   | 27599   | 18644            | 0,4     |  |
| 4002    | 1818    | 2593    | 4889    | 2110    | 4944    | 3215             | 0,1     |  |
| 6734    | 3215    | 12291   | 11702   | 3743    | 6736    | 6945             | 0,1     |  |
| 10148   | 4694    | 17900   | 16318   | 9931    | 17972   | 11408            | 0,2     |  |
| 10182   | 4919    | 13582   | 18398   | 14856   | 54420   | 15991            | 0,3     |  |
| 2116    | 2320    | 1296    | 3310    | 2273    | 3409    | 2247             | 0,0     |  |
| 4427746 | 3309477 | 4210932 | 6768744 | 4381979 | 8454147 | 4782295          | 100,0   |  |
| 2339    | 4612    | 1243    | 2022    | 3659    | 3292    | 2697             | 5,3     |  |
| 6481    | 15477   | 3976    | 6063    | 16778   | 12982   | 8871             | 17,4    |  |
| 5344    | 11618   | 3349    | 6609    | 9687    | 11285   | 7133             | 14,0    |  |
| 25139   | 66370   | 19103   | 30278   | 22212   | 26529   | 27595            | 54,0    |  |
| 5163    | 13269   | 2663    | 1267    | 4332    | 5997    | 4796             | 9,4     |  |
| 44466   | 111346  | 30334   | 46238   | 56667   | 60086   | 51091            | 100,0   |  |
| 769     | 464     | 778     | 610     | 487     | 612     | 628              |         |  |
|         |         |         |         |         |         | 628              | 100,0   |  |
| 8544    | 7853    | 6464    | 12453   | 11639   | 22553   | 10679            | 1,7     |  |
| 1239    | 1545    | 1030    | 1418    | 1345    | 2937    | 1481             | 0,2     |  |
| 4330    | 937     | 2996    | 5281    | 1417    | 2824    | 3031             | 0,5     |  |
| 9385    | 2309    | 5861    | 12055   | 9761    | 15623   | 9116             | 1,4     |  |
| 274863  | 213261  | 212016  | 372762  | 238857  | 518075  | 284747           | 44,3    |  |
| 22770   | 31552   | 24660   | 32137   | 23001   | 39907   | 26635            | 4,1     |  |
| 6424    | 6603    | 5720    | 6325    | 5465    | 5189    | 5933             | 0,9     |  |
| 7742    | 26483   | 19400   | 13372   | 5823    | 8649    | 12428            | 1,9     |  |
| 486     | 797     | 759     | 842     | 553     | 711     | 649              | 0,1     |  |
| 8641    | 9030    | 5496    | 7693    | 8604    | 15139   | 8829             | 1,4     |  |
| 17677   | 9415    | 11546   | 16337   | 28181   | 45292   | 20816            | 3,2     |  |

|        |        |        |        |        |         |        |       |
|--------|--------|--------|--------|--------|---------|--------|-------|
| 9603   | 4195   | 5889   | 9549   | 4603   | 8409    | 6905   | 1,1   |
| 2677   | 831    | 2155   | 2570   | 1183   | 1788    | 2090   | 0,3   |
| 33012  | 13557  | 16339  | 32045  | 27763  | 59735   | 28688  | 4,5   |
| 179581 | 201594 | 102034 | 218942 | 111202 | 369199  | 177739 | 27,7  |
| 32463  | 13995  | 23129  | 29996  | 45523  | 93531   | 38842  | 6,0   |
| 2219   | 5279   | 1431   | 1841   | 5514   | 7812    | 3573   | 0,6   |
| 621655 | 549233 | 446924 | 775620 | 530435 | 1217372 | 642181 | 100,0 |
| 12860  | 8389   | 7303   | 8881   | 6570   | 12409   | 8792   | 65,4  |
| 7047   | 1894   | 3135   | 3534   | 4679   | 7320    | 4649   | 34,6  |
| 19907  | 10284  | 10437  | 12415  | 11249  | 19729   | 13441  | 100,0 |
| 2317   | 6650   | 4764   | 4384   | 1728   | 1866    | 3691   | 14,2  |
| 10772  | 25198  | 20274  | 15394  | 4440   | 6005    | 13028  | 50,0  |
| 8242   | 9498   | 11460  | 10636  | 5267   | 6186    | 9322   | 35,8  |
| 21331  | 41346  | 36497  | 30414  | 11436  | 14057   | 26042  | 100,0 |
| 432    | 1266   | 621    | 563    | 296    | 570     | 565    | 6,7   |
| 5131   | 3479   | 3286   | 3767   | 2383   | 5034    | 3736   | 44,4  |
| 421    | 3941   | 646    | 757    | 417    | 896     | 984    | 11,7  |
| 720    | 968    | 527    | 873    | 473    | 725     | 714    | 8,5   |
| 326    | 352    | 378    | 251    | 255    | 375     | 327    | 3,9   |
| 2055   | 6270   | 821    | 1329   | 989    | 817     | 2084   | 24,8  |
| 9085   | 16276  | 6279   | 7540   | 4814   | 8416    | 8409   | 100,0 |
| 1161   | 6414   | 1424   | 1598   | 930    | 1059    | 1862   | 0,1   |
| 1624   | 5664   | 2727   | 2802   | 1855   | 3485    | 2632   | 0,2   |
| 2491   | 14342  | 3342   | 3386   | 2731   | 3238    | 4258   | 0,3   |
| 2501   | 6626   | 5780   | 5176   | 4370   | 11058   | 5095   | 0,4   |
| 5526   | 20320  | 12583  | 11555  | 9616   | 23653   | 11782  | 0,9   |
| 5282   | 27337  | 8902   | 8643   | 6732   | 11388   | 9868   | 0,7   |
| 3800   | 12353  | 6107   | 6658   | 3113   | 2570    | 5115   | 0,4   |
| 4109   | 26507  | 5525   | 6290   | 3477   | 2417    | 7064   | 0,5   |
| 2183   | 4015   | 6416   | 4650   | 5473   | 19387   | 5937   | 0,4   |
| 7931   | 21756  | 18806  | 16565  | 18107  | 66803   | 20802  | 1,5   |
| 12130  | 40986  | 30037  | 25329  | 23774  | 71394   | 28751  | 2,1   |
| 13363  | 34954  | 18706  | 18736  | 15937  | 23153   | 18803  | 1,4   |
| 3199   | 7270   | 6194   | 6795   | 2743   | 3821    | 4488   | 0,3   |
| 4795   | 15302  | 8809   | 9195   | 4065   | 4665    | 6963   | 0,5   |
| 3080   | 14952  | 4162   | 4771   | 2312   | 2247    | 4647   | 0,3   |
| 2296   | 3380   | 7861   | 5478   | 6770   | 32323   | 7994   | 0,6   |
| 13498  | 24984  | 30860  | 25480  | 33919  | 136516  | 36699  | 2,7   |
| 50279  | 115425 | 123390 | 99606  | 107698 | 354946  | 119919 | 8,7   |
| 40611  | 73816  | 80776  | 63432  | 58965  | 142380  | 67320  | 4,9   |
| 15076  | 23313  | 21220  | 19572  | 18717  | 26718   | 19159  | 1,4   |
| 2147   | 2805   | 4487   | 4194   | 1910   | 5190    | 3118   | 0,2   |
| 4296   | 6673   | 9104   | 8648   | 3845   | 8749    | 6219   | 0,5   |
| 3903   | 7611   | 6499   | 5920   | 3336   | 5168    | 4919   | 0,4   |
| 5212   | 5483   | 5935   | 5148   | 4778   | 8363    | 5518   | 0,4   |
| 18808  | 18580  | 20084  | 19964  | 19264  | 47914   | 22055  | 1,6   |
| 39718  | 43299  | 53421  | 52457  | 53709  | 177101  | 60950  | 4,4   |
| 68483  | 158338 | 151262 | 127695 | 129337 | 469353  | 155682 | 11,3  |
| 84353  | 246618 | 246652 | 180004 | 118482 | 397951  | 182351 | 13,2  |
| 26295  | 50911  | 66958  | 46782  | 29930  | 81573   | 44343  | 3,2   |
| 7320   | 8829   | 11749  | 10419  | 8243   | 11503   | 9115   | 0,7   |
| 4203   | 4255   | 8201   | 7898   | 4216   | 9867    | 5967   | 0,4   |

|        |         |         |         |         |         |         |       |
|--------|---------|---------|---------|---------|---------|---------|-------|
| 5832   | 7350    | 13175   | 11270   | 7291    | 12093   | 8774    | 0,6   |
| 12485  | 12766   | 14653   | 14157   | 14290   | 39331   | 16302   | 1,2   |
| 18475  | 19735   | 24697   | 22816   | 28779   | 120357  | 33450   | 2,4   |
| 32346  | 58349   | 54532   | 50986   | 65364   | 293731  | 77265   | 5,6   |
| 71185  | 245985  | 204066  | 166214  | 112197  | 369540  | 166101  | 12,0  |
| 26355  | 68272   | 89817   | 68036   | 38440   | 133861  | 61044   | 4,4   |
| 6046   | 10373   | 15295   | 12053   | 6366    | 31258   | 11804   | 0,9   |
| 2047   | 3936    | 8294    | 5173    | 6983    | 50305   | 10312   | 0,7   |
| 3430   | 8704    | 13210   | 9885    | 14621   | 134668  | 24130   | 1,7   |
| 5339   | 16172   | 16060   | 14531   | 16568   | 128486  | 26105   | 1,9   |
| 4880   | 18849   | 14808   | 13147   | 9809    | 49306   | 15161   | 1,1   |
| 3257   | 7594    | 7353    | 7150    | 4431    | 17171   | 6694    | 0,5   |
| 1342   | 2656    | 2783    | 2350    | 1751    | 2996    | 2068    | 0,1   |
| 958    | 1747    | 3724    | 2413    | 4694    | 39301   | 6860    | 0,5   |
| 1586   | 3528    | 4483    | 3743    | 7349    | 72655   | 12038   | 0,9   |
| 1171   | 3159    | 3138    | 3239    | 4103    | 28486   | 5698    | 0,4   |
| 1266   | 4223    | 3622    | 3354    | 2682    | 11062   | 3622    | 0,3   |
| 1232   | 2964    | 2736    | 2415    | 1873    | 4806    | 2342    | 0,2   |
| 1028   | 2057    | 1526    | 1378    | 1065    | 1789    | 1349    | 0,1   |
| 760    | 1509    | 1641    | 1626    | 1325    | 2302    | 1347    | 0,1   |
| 660697 | 1553048 | 1487591 | 1230782 | 1058331 | 3709457 | 1381859 | 100,0 |
| 20171  | 27227   | 6552    | 4335    | 4267    | 5593    | 11161   | 9,3   |
| 8569   | 10785   | 5602    | 4989    | 7221    | 4991    | 7115    | 5,9   |
| 5822   | 15860   | 8601    | 7292    | 6872    | 12624   | 8428    | 7,0   |
| 10697  | 7744    | 13882   | 12481   | 17651   | 11534   | 12896   | 10,8  |
| 5489   | 22400   | 8619    | 9294    | 6770    | 13112   | 9375    | 7,8   |
| 3571   | 4577    | 5303    | 6159    | 3412    | 4924    | 4332    | 3,6   |
| 64901  | 63219   | 59505   | 53767   | 80762   | 73451   | 66431   | 55,5  |
| 119221 | 151812  | 108066  | 98318   | 126955  | 126229  | 119738  | 100,0 |
| 6099   | 5871    | 3862    | 5966    | 17288   | 18764   | 8504    | 4,2   |
| 9039   | 18038   | 4085    | 7517    | 27277   | 20537   | 12642   | 6,2   |
| 24943  | 24492   | 13242   | 22644   | 40767   | 40396   | 25994   | 12,7  |
| 4000   | 1412    | 2969    | 6343    | 4212    | 4421    | 3757    | 1,8   |
| 5638   | 10142   | 2575    | 4474    | 16849   | 11978   | 7412    | 3,6   |
| 51076  | 49755   | 49059   | 72179   | 55746   | 55873   | 52062   | 25,5  |
| 17784  | 13263   | 15930   | 21328   | 16436   | 16737   | 16297   | 8,0   |
| 23133  | 7896    | 35361   | 49637   | 19960   | 22784   | 24979   | 12,2  |
| 24008  | 19865   | 14139   | 23435   | 35704   | 49996   | 24645   | 12,1  |
| 10315  | 11329   | 5117    | 9494    | 11079   | 14646   | 9388    | 4,6   |
| 10914  | 6226    | 14221   | 15249   | 9909    | 15699   | 11030   | 5,4   |
| 4852   | 5185    | 6628    | 7621    | 10441   | 19596   | 7549    | 3,7   |
| 191801 | 173474  | 167186  | 245886  | 265669  | 291428  | 204261  | 100,0 |
| 2052   | 5986    | 662     | 1199    | 3600    | 3885    | 2594    | 1,1   |
| 1275   | 3133    | 508     | 845     | 2163    | 2462    | 1561    | 0,7   |
| 27423  | 80190   | 12738   | 21808   | 31053   | 45906   | 32142   | 14,2  |
| 1099   | 685     | 430     | 776     | 393     | 484     | 619     | 0,3   |
| 1729   | 726     | 1418    | 2013    | 643     | 1012    | 1259    | 0,6   |
| 23669  | 14881   | 24841   | 36125   | 12919   | 18288   | 20697   | 9,1   |
| 21120  | 62158   | 8830    | 15834   | 13879   | 22482   | 20938   | 9,2   |
| 13064  | 15756   | 7141    | 11920   | 9586    | 15848   | 11511   | 5,1   |
| 5557   | 5147    | 8790    | 10546   | 3624    | 4039    | 5832    | 2,6   |

|        |        |        |        |        |        |        |       |
|--------|--------|--------|--------|--------|--------|--------|-------|
| 22472  | 30836  | 34864  | 47560  | 10118  | 13792  | 23345  | 10,3  |
| 36983  | 33821  | 60594  | 91193  | 27286  | 46489  | 44592  | 19,7  |
| 15622  | 24988  | 11693  | 22015  | 38004  | 73470  | 25779  | 11,4  |
| 4367   | 9744   | 1890   | 4284   | 11519  | 15514  | 6597   | 2,9   |
| 1777   | 3521   | 1089   | 1971   | 4197   | 4820   | 2435   | 1,1   |
| 3450   | 6579   | 8289   | 9473   | 1626   | 1742   | 4635   | 2,0   |
| 3831   | 3466   | 7672   | 9446   | 2080   | 2287   | 4640   | 2,0   |
| 5826   | 8178   | 7534   | 9545   | 5578   | 7273   | 6483   | 2,9   |
| 7056   | 16215  | 7333   | 11606  | 13614  | 25935  | 11149  | 4,9   |
| 198373 | 326011 | 206315 | 308160 | 191882 | 305728 | 226808 | 100,0 |
| 632    | 462    | 534    | 558    | 353    | 830    | 574    | 7,8   |
| 1268   | 545    | 1003   | 608    | 534    | 1314   | 917    | 12,5  |
| 2831   | 1617   | 2140   | 2978   | 1612   | 2935   | 2519   | 34,3  |
| 2704   | 546    | 14945  | 4060   | 514    | 1510   | 3336   | 45,4  |
| 7436   | 3170   | 18621  | 8203   | 3012   | 6589   | 7346   | 100,0 |
| 1951   | 1232   | 1218   | 2067   | 2827   | 2087   | 1864   | 1,2   |
| 5468   | 8513   | 4539   | 7570   | 13086  | 10583  | 7561   | 5,1   |
| 9933   | 6768   | 7538   | 12011  | 11231  | 7748   | 9496   | 6,3   |
| 2276   | 959    | 2617   | 4141   | 2228   | 2743   | 2371   | 1,6   |
| 3771   | 4749   | 2301   | 5120   | 7803   | 9249   | 4825   | 3,2   |
| 14006  | 24798  | 9770   | 16348  | 15607  | 19267  | 14978  | 10,0  |
| 12401  | 13267  | 15519  | 24580  | 11587  | 15209  | 14157  | 9,5   |
| 10656  | 6099   | 13800  | 14542  | 5741   | 6679   | 9005   | 6,0   |
| 41149  | 24819  | 66049  | 74414  | 22725  | 31929  | 39343  | 26,3  |
| 19467  | 40979  | 19928  | 29162  | 30717  | 56390  | 27987  | 18,7  |
| 5126   | 18290  | 3408   | 6515   | 8248   | 13228  | 7822   | 5,2   |
| 1232   | 737    | 2394   | 2804   | 1661   | 1983   | 1713   | 1,1   |
| 1688   | 1626   | 2773   | 2978   | 2255   | 2594   | 2140   | 1,4   |
| 1990   | 2056   | 1992   | 2439   | 2383   | 3512   | 2104   | 1,4   |
| 3434   | 4797   | 2681   | 5936   | 6131   | 6191   | 4336   | 2,9   |
| 134547 | 159688 | 156528 | 210628 | 144229 | 189393 | 149704 | 100,0 |
| 860    | 750    | 602    | 873    | 395    | 448    | 662    | 2,5   |
| 1734   | 1714   | 3290   | 3804   | 1322   | 1359   | 2076   | 8,0   |
| 10546  | 13831  | 15977  | 20453  | 4707   | 6784   | 10681  | 41,1  |
| 3196   | 4441   | 847    | 2175   | 1838   | 1936   | 2158   | 8,3   |
| 1821   | 3086   | 4142   | 4691   | 844    | 943    | 2312   | 8,9   |
| 1732   | 1672   | 3782   | 4620   | 1005   | 1055   | 2206   | 8,5   |
| 3878   | 5527   | 1166   | 2644   | 1556   | 2768   | 2578   | 9,9   |
| 3585   | 896    | 4649   | 8212   | 1071   | 1929   | 3309   | 12,7  |
| 27353  | 31917  | 34454  | 47473  | 12739  | 17222  | 25981  | 100,0 |
| 9988   | 3383   | 5041   | 9596   | 13369  | 17088  | 9246   | 6,8   |
| 8942   | 14184  | 5516   | 8497   | 8197   | 13371  | 8746   | 6,4   |
| 91371  | 51050  | 86576  | 128167 | 45416  | 81708  | 78426  | 57,3  |
| 3947   | 5817   | 2972   | 2826   | 5229   | 4003   | 3938   | 2,9   |
| 7289   | 6767   | 5067   | 7253   | 4391   | 9085   | 5979   | 4,4   |
| 13121  | 10036  | 8952   | 14805  | 13985  | 18182  | 12226  | 8,9   |
| 2996   | 2850   | 1917   | 2557   | 5272   | 7862   | 3510   | 2,6   |
| 15680  | 17185  | 12305  | 17425  | 12657  | 18915  | 14783  | 10,8  |
| 153334 | 111271 | 128345 | 191128 | 108517 | 170212 | 136855 | 100,0 |
| 58782  | 43777  | 33242  | 42155  | 24099  | 63797  | 39671  | 56,2  |
| 2902   | 3878   | 2309   | 1769   | 938    | 1511   | 2126   | 3,0   |



|         |         |         |         |         |         |         |       |
|---------|---------|---------|---------|---------|---------|---------|-------|
| 5676    | 9695    | 9756    | 6658    | 2358    | 3349    | 5571    | 7,9   |
| 3340    | 3107    | 1621    | 2201    | 1467    | 3506    | 2434    | 3,5   |
| 7001    | 3634    | 2954    | 4086    | 3129    | 5820    | 4518    | 6,4   |
| 24173   | 9316    | 8462    | 13530   | 16498   | 24753   | 16222   | 23,0  |
| 101873  | 73405   | 58346   | 70400   | 48487   | 102738  | 70543   | 100,0 |
| 72485   | 130599  | 35999   | 57094   | 36920   | 38895   | 64706   | 1,2   |
| 58864   | 248937  | 23970   | 41460   | 24656   | 19282   | 68514   | 1,3   |
| 60692   | 104956  | 75552   | 99259   | 46635   | 85034   | 72627   | 1,4   |
| 2641335 | 2984902 | 1015039 | 1515170 | 976730  | 652752  | 1639038 | 30,6  |
| 19102   | 19673   | 16233   | 29409   | 5984    | 8205    | 16377   | 0,3   |
| 115694  | 317326  | 38272   | 62019   | 46634   | 37125   | 97570   | 1,8   |
| 85899   | 62847   | 43182   | 56944   | 43871   | 73801   | 56063   | 1,0   |
| 516842  | 1120761 | 872450  | 946380  | 283661  | 689612  | 655333  | 12,2  |
| 4150710 | 2549546 | 1693261 | 2297059 | 1805812 | 1149583 | 2297693 | 42,9  |
| 5570    | 7594    | 5792    | 7837    | 1696    | 4364    | 5314    | 0,1   |
| 34824   | 77698   | 14227   | 18791   | 15185   | 8452    | 26934   | 0,5   |
| 58954   | 10732   | 152429  | 179948  | 3566    | 13150   | 67426   | 1,3   |
| 35392   | 53683   | 48721   | 70090   | 34588   | 190898  | 59592   | 1,1   |
| 14043   | 45721   | 20477   | 28649   | 14474   | 50331   | 23935   | 0,4   |
| 15741   | 50689   | 24506   | 30701   | 10846   | 29124   | 22832   | 0,4   |
| 95230   | 107677  | 38833   | 55197   | 44555   | 21148   | 61091   | 1,1   |
| 12599   | 38897   | 6217    | 8808    | 7196    | 2994    | 13470   | 0,3   |
| 3200    | 1648    | 10945   | 10979   | 1159    | 1923    | 4711    | 0,1   |
| 6459    | 2968    | 11937   | 9625    | 1838    | 4014    | 5806    | 0,1   |
| 7043    | 5273    | 19844   | 17955   | 5862    | 20507   | 11009   | 0,2   |
| 9347    | 11488   | 10641   | 17759   | 14393   | 72861   | 18221   | 0,3   |
| 2827    | 6901    | 3690    | 5009    | 3600    | 9373    | 4410    | 0,1   |
| 3761    | 11000   | 5928    | 6672    | 2978    | 6765    | 5404    | 0,1   |
| 52514   | 121030  | 24641   | 45402   | 26595   | 19100   | 51642   | 1,0   |
| 8079129 | 8092548 | 4212784 | 5618217 | 3459435 | 3209292 | 5349715 | 100,0 |

| PM           | PM          | PM           | PM           | PM           | PM        | PM         | PM         |
|--------------|-------------|--------------|--------------|--------------|-----------|------------|------------|
| SK-MEL-28 (I | Mel-HO (P9) | SK-MEL-28 (I | Mel-HO (P10) | SK-MEL-31 (I | A375 (P9) | A375 (P10) | G-361 (P5) |
| 12908        | 64508       | 16025        | 97795        | 6035         | 20798     | 22803      | 58325      |
| 76811        | 632591      | 254337       | 1054541      | 132209       | 90600     | 112023     | 529125     |
| 30393        | 31863       | 33851        | 44097        | 41709        | 19471     | 31406      | 52323      |
| 17272        | 70735       | 18997        | 84048        | 10925        | 10993     | 9017       | 73552      |
| 177561       | 1266019     | 621863       | 2284275      | 207779       | 280066    | 300199     | 1949467    |
| 130230       | 552344      | 365805       | 780629       | 431473       | 96815     | 139333     | 547622     |
| 67471        | 711709      | 310965       | 1039825      | 140478       | 160801    | 208724     | 1025642    |
| 901998       | 2716154     | 2348037      | 3857984      | 1404416      | 1716740   | 1685139    | 3365960    |
| 9259         | 24096       | 24591        | 41591        | 52912        | 33519     | 46769      | 33101      |
| 16335        | 34228       | 52856        | 57317        | 34405        | 53241     | 38493      | 111615     |
| 13282        | 25630       | 33963        | 21233        | 94225        | 16819     | 12779      | 17692      |
| 18828        | 76059       | 78107        | 151500       | 110914       | 59915     | 62475      | 100462     |
| 187121       | 1313753     | 682407       | 1492166      | 314077       | 851374    | 834422     | 1251844    |
| 82644        | 200121      | 307624       | 474338       | 174104       | 781161    | 534210     | 334436     |
| 80278        | 24990       | 30449        | 41150        | 112819       | 65259     | 32775      | 25005      |
| 5811         | 8272        | 13947        | 13474        | 34608        | 12971     | 9563       | 10699      |
| 10385        | 52191       | 31719        | 79823        | 10848        | 23501     | 15167      | 50639      |
| 2130         | 3547        | 3360         | 5611         | 3262         | 5992      | 4642       | 4695       |
| 32078        | 3889        | 11145        | 15082        | 19575        | 19683     | 7026       | 6655       |
| 7352         | 6180        | 9710         | 8061         | 23448        | 8560      | 5614       | 6801       |
| 3513         | 2468        | 3855         | 3888         | 9285         | 3811      | 2921       | 2915       |
| 2408         | 2478        | 1828         | 3651         | 1768         | 3286      | 2805       | 3577       |
| 1886066      | 7823825     | 5255439      | 11652078     | 3371273      | 4335377   | 4118303    | 9562154    |
| 4424         | 56664       | 19832        | 103652       | 6609         | 3954      | 9959       | 32292      |
| 18737        | 135854      | 46680        | 202770       | 17732        | 19534     | 27571      | 127789     |
| 35399        | 286428      | 156930       | 404642       | 37063        | 12005     | 45456      | 131268     |
| 68167        | 837574      | 341610       | 1429569      | 100673       | 52185     | 113683     | 498929     |
| 2059         | 71578       | 29795        | 125001       | 9895         | 2985      | 14121      | 40161      |
| 128785       | 1388097     | 594847       | 2265634      | 171973       | 90663     | 210790     | 830437     |
| 1013         | 1561        | 1406         | 1628         | 541          | 891       | 861        | 2371       |
| 37149        | 9855        | 3221         | 1618         | 2842         | 41536     | 21576      | 1849       |
| 8250         | 2126        | 560          | 427          | 635          | 8259      | 4096       | 801        |
| 2498         | 819         | 3302         | 1128         | 1770         | 2819      | 3068       | 2220       |
| 2620         | 2192        | 3964         | 3071         | 4506         | 2655      | 3281       | 3176       |
| 42310        | 12758       | 80230        | 21860        | 64881        | 33833     | 26462      | 67339      |
| 4964         | 2427        | 8934         | 3991         | 8716         | 4199      | 3116       | 16414      |
| 3546         | 5747        | 6439         | 5964         | 6758         | 3098      | 4674       | 6370       |
| 5563         | 2216        | 9978         | 2045         | 4764         | 9459      | 7452       | 5842       |
| 415          | 901         | 929          | 1276         | 759          | 731       | 717        | 1229       |
| 1386         | 1666        | 2619         | 2889         | 3845         | 2675      | 2081       | 3267       |
| 3245         | 2291        | 4431         | 2827         | 6696         | 5997      | 4048       | 3674       |

|        |       |        |       |        |        |        |        |
|--------|-------|--------|-------|--------|--------|--------|--------|
| 2898   | 2034  | 5285   | 3093  | 6278   | 2981   | 2941   | 4048   |
| 1160   | 780   | 1667   | 834   | 2407   | 2014   | 1559   | 864    |
| 4230   | 7109  | 11007  | 8773  | 23001  | 20553  | 16196  | 8867   |
| 20519  | 22980 | 40357  | 32052 | 92581  | 15637  | 15216  | 37512  |
| 4930   | 3068  | 10177  | 3219  | 16288  | 10651  | 10013  | 7838   |
| 512    | 476   | 690    | 497   | 1494   | 435    | 537    | 892    |
| 146195 | 79447 | 193790 | 95564 | 248222 | 167533 | 127033 | 172203 |
| 1842   | 8289  | 3732   | 9436  | 6167   | 3777   | 4001   | 6231   |
| 1499   | 2792  | 2782   | 3672  | 2863   | 4738   | 5305   | 4410   |
| 3341   | 11081 | 6514   | 13107 | 9030   | 8514   | 9307   | 10642  |
| 2285   | 8859  | 3037   | 10315 | 1599   | 3503   | 3001   | 9437   |
| 7560   | 57427 | 14752  | 55560 | 5666   | 7911   | 6811   | 31323  |
| 5743   | 27589 | 11589  | 31141 | 3182   | 12191  | 11960  | 26509  |
| 15587  | 93874 | 29379  | 97015 | 10446  | 23605  | 21771  | 67269  |
| 379    | 2401  | 684    | 3843  | 262    | 557    | 861    | 2200   |
| 1309   | 2778  | 1514   | 3613  | 4347   | 1524   | 1715   | 2399   |
| 398    | 1330  | 435    | 1232  | 287    | 529    | 687    | 1115   |
| 420    | 1500  | 521    | 2061  | 563    | 461    | 493    | 1067   |
| 738    | 188   | 2141   | 109   | 406    | 7893   | 7481   | 288    |
| 3698   | 2694  | 932    | 2318  | 1429   | 1170   | 1392   | 4565   |
| 6942   | 10890 | 6227   | 13176 | 7294   | 12134  | 12629  | 11633  |
| 3179   | 1094  | 722    | 2012  | 982    | 1678   | 1197   | 3951   |
| 2493   | 1370  | 1050   | 2885  | 1383   | 1990   | 1551   | 10995  |
| 4031   | 3019  | 1997   | 2348  | 2105   | 3621   | 4236   | 21115  |
| 2281   | 2674  | 1795   | 3706  | 2132   | 1728   | 1544   | 14050  |
| 6720   | 6815  | 5548   | 7491  | 5592   | 7171   | 8646   | 125233 |
| 8797   | 7321  | 7448   | 7386  | 5396   | 14584  | 15353  | 111107 |
| 2346   | 2490  | 2463   | 3155  | 3411   | 1420   | 2345   | 19136  |
| 6043   | 3936  | 3460   | 2692  | 3639   | 3248   | 4258   | 24551  |
| 1419   | 1994  | 1114   | 2356  | 1639   | 1149   | 1206   | 7113   |
| 6865   | 11338 | 7040   | 10614 | 6489   | 5935   | 6445   | 137525 |
| 16663  | 20294 | 27185  | 23822 | 12214  | 29080  | 39696  | 553040 |
| 13013  | 14468 | 26628  | 11959 | 14327  | 28222  | 52128  | 191421 |
| 2905   | 2398  | 2581   | 2385  | 2640   | 2027   | 1952   | 17963  |
| 5895   | 3613  | 6918   | 3568  | 4654   | 5939   | 7089   | 86032  |
| 4121   | 2752  | 4434   | 1874  | 2924   | 6497   | 6123   | 33867  |
| 1191   | 1086  | 955    | 1002  | 1644   | 1066   | 1251   | 2849   |
| 5922   | 9776  | 8088   | 7398  | 8367   | 5000   | 6933   | 62094  |
| 24422  | 45487 | 53385  | 33232 | 30899  | 26614  | 51519  | 780893 |
| 22896  | 38648 | 84792  | 23390 | 33073  | 62752  | 177372 | 847890 |
| 9519   | 12497 | 25624  | 8464  | 14678  | 46353  | 79798  | 151865 |
| 1406   | 1093  | 1215   | 1279  | 1537   | 894    | 1394   | 6560   |
| 4042   | 3224  | 6303   | 3054  | 3368   | 4555   | 7055   | 68080  |
| 3982   | 3665  | 6998   | 2947  | 3745   | 11383  | 12050  | 72510  |
| 2131   | 2305  | 2475   | 2781  | 2888   | 1950   | 1350   | 2822   |
| 5428   | 7898  | 7992   | 6923  | 9022   | 4781   | 7363   | 9790   |
| 10004  | 15841 | 16602  | 11357 | 20615  | 8180   | 15086  | 26064  |
| 20106  | 41501 | 43063  | 22552 | 41086  | 18497  | 40032  | 279083 |
| 30903  | 71847 | 106161 | 35667 | 67343  | 58813  | 155413 | 739884 |
| 13297  | 17946 | 41380  | 13129 | 23328  | 87528  | 135007 | 336170 |
| 4146   | 4354  | 9902   | 4228  | 6947   | 43573  | 39476  | 35636  |
| 1654   | 2021  | 3558   | 1355  | 3116   | 2200   | 3008   | 18917  |

|        |        |        |        |        |        |         |         |
|--------|--------|--------|--------|--------|--------|---------|---------|
| 2450   | 4519   | 7919   | 3215   | 5151   | 5776   | 7951    | 49250   |
| 4621   | 6222   | 6607   | 5183   | 9349   | 4231   | 6633    | 10651   |
| 5775   | 10459  | 10068  | 7168   | 14309  | 6031   | 9719    | 16902   |
| 9010   | 16737  | 21115  | 12174  | 25258  | 9068   | 20839   | 44358   |
| 18563  | 45904  | 60263  | 27847  | 58163  | 23168  | 65342   | 221941  |
| 9746   | 17812  | 27262  | 12961  | 20627  | 27186  | 53079   | 185340  |
| 3436   | 3834   | 8012   | 3465   | 4794   | 25207  | 26723   | 40787   |
| 1111   | 1119   | 3319   | 917    | 8453   | 2669   | 2419    | 7510    |
| 1133   | 1247   | 2155   | 1069   | 6409   | 2205   | 2375    | 8812    |
| 1206   | 1428   | 2306   | 1099   | 4705   | 2040   | 2530    | 7486    |
| 1516   | 3112   | 3752   | 2358   | 3899   | 3370   | 4523    | 26795   |
| 1522   | 2429   | 3591   | 2144   | 2624   | 6563   | 6670    | 20767   |
| 1010   | 1132   | 1752   | 1131   | 1178   | 6647   | 7017    | 7369    |
| 689    | 431    | 997    | 496    | 2956   | 931    | 1156    | 6226    |
| 610    | 497    | 960    | 478    | 2180   | 933    | 1181    | 4053    |
| 498    | 378    | 689    | 395    | 1121   | 739    | 982     | 2333    |
| 719    | 1034   | 1269   | 805    | 1027   | 1428   | 1847    | 6196    |
| 1037   | 1228   | 1592   | 1048   | 1281   | 3868   | 4892    | 7889    |
| 1011   | 871    | 1582   | 855    | 969    | 8881   | 10034   | 5447    |
| 601    | 563    | 1064   | 650    | 784    | 3619   | 4814    | 3798    |
| 314084 | 485723 | 685150 | 352469 | 516420 | 642989 | 1128602 | 5482115 |
| 3927   | 11596  | 4199   | 17438  | 2679   | 6048   | 5265    | 11569   |
| 4605   | 7468   | 7498   | 10930  | 4825   | 5823   | 7506    | 9771    |
| 6136   | 21253  | 14033  | 29683  | 6130   | 13723  | 19279   | 22633   |
| 8407   | 12239  | 17198  | 16025  | 11510  | 11534  | 15452   | 11487   |
| 3294   | 12568  | 6051   | 12241  | 3390   | 6816   | 9045    | 13656   |
| 1608   | 4442   | 3403   | 5052   | 1944   | 5605   | 6143    | 3292    |
| 43688  | 43328  | 31410  | 48832  | 50617  | 20290  | 44232   | 68884   |
| 71665  | 112894 | 83791  | 140201 | 81095  | 69837  | 106922  | 141292  |
| 3588   | 15373  | 7237   | 11740  | 1918   | 2928   | 3518    | 26624   |
| 6235   | 89187  | 20783  | 54574  | 3344   | 8082   | 11457   | 81783   |
| 15982  | 55095  | 34167  | 49910  | 9797   | 17816  | 20963   | 76829   |
| 1864   | 4414   | 5245   | 4203   | 3246   | 2290   | 2546    | 5368    |
| 3202   | 12396  | 7617   | 11228  | 2978   | 5737   | 5829    | 11403   |
| 25635  | 126382 | 59560  | 123819 | 40418  | 52207  | 54748   | 74045   |
| 10503  | 24274  | 20050  | 24064  | 19337  | 11383  | 14838   | 21875   |
| 5874   | 8538   | 9518   | 9778   | 26561  | 15923  | 17071   | 8162    |
| 5262   | 6180   | 6801   | 6343   | 5751   | 5779   | 4756    | 7458    |
| 2321   | 11949  | 5413   | 11380  | 2638   | 4067   | 2746    | 10112   |
| 10337  | 23541  | 16194  | 22079  | 18005  | 12816  | 12814   | 18242   |
| 1797   | 1648   | 2553   | 2413   | 3125   | 1872   | 1611    | 2484    |
| 92600  | 378977 | 195137 | 331532 | 137117 | 140901 | 152896  | 344385  |
| 3489   | 10135  | 4704   | 14431  | 1032   | 2625   | 2224    | 36357   |
| 1212   | 2613   | 2034   | 4461   | 1188   | 1002   | 920     | 3803    |
| 29807  | 74175  | 56832  | 122731 | 12980  | 29249  | 20764   | 168283  |
| 878    | 850    | 1126   | 1212   | 512    | 831    | 534     | 1896    |
| 5005   | 2444   | 7345   | 4309   | 5243   | 4048   | 2927    | 4651    |
| 9685   | 7744   | 14439  | 15618  | 19023  | 12239  | 8863    | 12636   |
| 8486   | 26807  | 14998  | 39113  | 4488   | 7104   | 4338    | 31835   |
| 7481   | 17118  | 13954  | 30585  | 4378   | 17856  | 10799   | 29158   |
| 8632   | 7974   | 14364  | 15482  | 6843   | 8096   | 5972    | 15043   |

|        |        |        |        |        |        |        |        |
|--------|--------|--------|--------|--------|--------|--------|--------|
| 8116   | 8874   | 13245  | 20268  | 17448  | 11453  | 7928   | 15120  |
| 4962   | 3613   | 7523   | 7930   | 29816  | 14824  | 9146   | 6577   |
| 2076   | 1917   | 3000   | 3025   | 6978   | 5616   | 3658   | 2879   |
| 828    | 5039   | 1575   | 4494   | 1310   | 2045   | 1154   | 6282   |
| 806    | 2416   | 1390   | 3751   | 1055   | 1924   | 1529   | 4315   |
| 1898   | 5871   | 3700   | 7615   | 2048   | 1547   | 1343   | 5589   |
| 2796   | 2331   | 3881   | 5878   | 4526   | 6960   | 4153   | 4462   |
| 3679   | 3749   | 5562   | 6968   | 9165   | 7633   | 5126   | 7111   |
| 1324   | 1662   | 2040   | 2105   | 5761   | 1478   | 1594   | 2514   |
| 101159 | 185333 | 171710 | 309976 | 133796 | 136529 | 92971  | 358510 |
| 367    | 2824   | 1156   | 1507   | 384    | 336    | 582    | 2204   |
| 680    | 6939   | 5341   | 4796   | 530    | 521    | 955    | 11122  |
| 1029   | 6386   | 3974   | 4808   | 1408   | 1804   | 2386   | 6864   |
| 607    | 3560   | 3755   | 899    | 962    | 504    | 1623   | 2876   |
| 2683   | 19709  | 14225  | 12009  | 3285   | 3166   | 5546   | 23066  |
| 878    | 3442   | 2432   | 6536   | 779    | 909    | 1303   | 3629   |
| 3335   | 21814  | 9718   | 30216  | 2139   | 2460   | 3783   | 21280  |
| 4606   | 19240  | 16487  | 32256  | 4972   | 6836   | 9596   | 15880  |
| 1649   | 2224   | 4305   | 3816   | 3160   | 2069   | 2203   | 6267   |
| 1745   | 3925   | 5473   | 6755   | 2756   | 2199   | 2962   | 7077   |
| 7516   | 41831  | 26644  | 64264  | 8141   | 14326  | 21337  | 47926  |
| 5513   | 37366  | 20149  | 62611  | 6644   | 21484  | 28289  | 19029  |
| 6763   | 11691  | 20536  | 21348  | 13538  | 9043   | 8497   | 25968  |
| 12676  | 11743  | 37566  | 25125  | 42826  | 29719  | 27298  | 53967  |
| 7886   | 8309   | 20117  | 17844  | 17655  | 15392  | 15372  | 25652  |
| 2948   | 10191  | 8266   | 14574  | 4471   | 6254   | 6905   | 10520  |
| 2225   | 2784   | 5746   | 3795   | 3886   | 2658   | 2777   | 7494   |
| 2507   | 2022   | 6089   | 3637   | 7630   | 4343   | 4413   | 7938   |
| 1653   | 1114   | 3213   | 1910   | 4772   | 2321   | 2420   | 4141   |
| 1239   | 3726   | 3133   | 4591   | 3235   | 1632   | 2228   | 3903   |
| 63140  | 181421 | 189874 | 299276 | 126606 | 121645 | 139384 | 260669 |
| 2387   | 1203   | 3099   | 2238   | 2767   | 2016   | 1310   | 2231   |
| 3320   | 2673   | 5957   | 5806   | 2371   | 3608   | 2680   | 5932   |
| 3603   | 4197   | 6359   | 8963   | 7901   | 5396   | 3757   | 6713   |
| 366    | 1955   | 1123   | 1561   | 309    | 584    | 629    | 2144   |
| 1113   | 2115   | 2057   | 3710   | 1067   | 824    | 850    | 2346   |
| 1394   | 1086   | 1941   | 2005   | 2064   | 3447   | 2581   | 1685   |
| 293    | 916    | 615    | 917    | 518    | 424    | 390    | 1055   |
| 1871   | 2467   | 4962   | 3149   | 1212   | 1884   | 1873   | 7378   |
| 14348  | 16611  | 26114  | 28351  | 18209  | 18182  | 14069  | 29484  |
| 3147   | 13699  | 12667  | 10899  | 4070   | 2573   | 4816   | 20510  |
| 3229   | 20683  | 9188   | 14264  | 3826   | 2906   | 3621   | 12788  |
| 17985  | 79599  | 62024  | 68617  | 51276  | 18288  | 28379  | 53572  |
| 6264   | 4650   | 4111   | 5097   | 2701   | 3648   | 3813   | 4553   |
| 1422   | 4579   | 3261   | 4107   | 2101   | 1107   | 1146   | 3699   |
| 6088   | 15956  | 12178  | 14550  | 7046   | 9260   | 10660  | 18225  |
| 1328   | 2292   | 2050   | 2299   | 3470   | 2234   | 2382   | 1945   |
| 7084   | 19829  | 12999  | 17625  | 9490   | 15186  | 16858  | 17223  |
| 46547  | 161288 | 118479 | 137459 | 83980  | 55202  | 71674  | 132517 |
| 4676   | 29973  | 12023  | 31945  | 9085   | 7209   | 8096   | 52009  |
| 1000   | 1625   | 924    | 1097   | 713    | 809    | 1157   | 2057   |

|         |         |         |         |         |         |         |         |
|---------|---------|---------|---------|---------|---------|---------|---------|
| 1858    | 6857    | 3698    | 5951    | 1369    | 2860    | 3193    | 8372    |
| 650     | 3452    | 969     | 2641    | 1039    | 1216    | 1445    | 2469    |
| 1452    | 3383    | 2090    | 3386    | 1762    | 3098    | 3338    | 3996    |
| 5899    | 8937    | 8818    | 12373   | 7656    | 16250   | 17847   | 13531   |
| 15535   | 54227   | 28522   | 57393   | 21622   | 31442   | 35075   | 82434   |
| 368052  | 58403   | 27412   | 24709   | 50257   | 137906  | 132418  | 65095   |
| 139939  | 25231   | 20669   | 16695   | 35367   | 20052   | 28965   | 38475   |
| 69466   | 33377   | 30455   | 24161   | 39354   | 28274   | 32280   | 44105   |
| 1933056 | 1236349 | 895512  | 1031290 | 908689  | 1032320 | 1050652 | 1202322 |
| 25604   | 7917    | 8519    | 7258    | 11878   | 9215    | 9419    | 9487    |
| 166957  | 51027   | 31137   | 27691   | 46778   | 37974   | 43837   | 54250   |
| 44861   | 21171   | 29939   | 18473   | 30505   | 25793   | 32165   | 18135   |
| 559381  | 209636  | 338146  | 120785  | 259918  | 456272  | 507376  | 277996  |
| 2127921 | 2277084 | 1384491 | 1858182 | 1207909 | 1619151 | 1724554 | 1986703 |
| 7217    | 5555    | 3419    | 1673    | 4275    | 5205    | 4823    | 9906    |
| 50095   | 13578   | 7624    | 6944    | 9676    | 10859   | 9155    | 13510   |
| 7706    | 2423    | 15674   | 1019    | 65571   | 4840    | 3679    | 2289    |
| 3160    | 1803    | 7025    | 1153    | 11859   | 3346    | 2695    | 2017    |
| 4176    | 2286    | 3827    | 1842    | 5232    | 3808    | 3549    | 2761    |
| 12738   | 11857   | 10102   | 7254    | 8708    | 19321   | 18536   | 15898   |
| 119130  | 58125   | 27873   | 31676   | 26468   | 47841   | 45375   | 60422   |
| 43541   | 9689    | 4739    | 4191    | 4751    | 7293    | 4923    | 15333   |
| 3436    | 1695    | 3291    | 828     | 9932    | 2793    | 3016    | 2090    |
| 2408    | 1676    | 5128    | 590     | 23210   | 4297    | 3582    | 1935    |
| 1701    | 1169    | 3279    | 1191    | 10342   | 1850    | 1743    | 1637    |
| 971     | 558     | 813     | 490     | 2311    | 712     | 866     | 564     |
| 1426    | 728     | 553     | 597     | 1138    | 2039    | 1690    | 984     |
| 5391    | 3804    | 2314    | 2640    | 2579    | 8120    | 6623    | 3632    |
| 103363  | 38192   | 25576   | 20264   | 18957   | 27356   | 22384   | 62593   |
| 5801698 | 4073335 | 2887518 | 3211597 | 2795663 | 3516635 | 3694304 | 3892141 |

| PM         | PM          | Primary Melanoma |         |  | MM          | MM         | MM           | MM           |
|------------|-------------|------------------|---------|--|-------------|------------|--------------|--------------|
| G-361 (P6) | SK-MEL-31(P | Mean             | % Class |  | Hs294T (P7) | A2058 (P5) | SK-MEL-3 (P5 | RPMI 7951 (P |
|            |             |                  |         |  |             |            |              |              |
| 66022      | 3794        | 36901            | 0,6     |  | 37500       | 41212      | 77057        | 22359        |
| 337330     | 122460      | 334203           | 5,8     |  | 259193      | 356093     | 749498       | 138604       |
| 51613      | 40331       | 37706            | 0,7     |  | 58371       | 52285      | 47366        | 50527        |
| 83679      | 5877        | 38509            | 0,7     |  | 39634       | 48820      | 39865        | 17568        |
| 1259032    | 231295      | 857756           | 14,8    |  | 1369854     | 1311320    | 1396343      | 685090       |
| 371346     | 372649      | 378825           | 6,5     |  | 295138      | 389814     | 430856       | 186060       |
| 575246     | 146616      | 438748           | 7,6     |  | 527820      | 799565     | 610906       | 386652       |
| 2554550    | 1687940     | 2223892          | 38,4    |  | 2986075     | 3340270    | 3500350      | 2478494      |
| 22796      | 44673       | 33331            | 0,6     |  | 48617       | 47197      | 42865        | 41769        |
| 63682      | 24666       | 48684            | 0,8     |  | 75012       | 60922      | 43416        | 54494        |
| 12467      | 45704       | 29379            | 0,5     |  | 57294       | 43954      | 31994        | 40138        |
| 48904      | 72382       | 77955            | 1,3     |  | 161728      | 147379     | 73924        | 117342       |
| 860445     | 224887      | 801249           | 13,8    |  | 1112394     | 1851582    | 1468718      | 1016063      |
| 179487     | 148490      | 321661           | 5,6     |  | 1098779     | 517726     | 809056       | 536551       |
| 69606      | 72959       | 55529            | 1,0     |  | 63888       | 50356      | 37579        | 47487        |
| 7693       | 21689       | 13873            | 0,2     |  | 38977       | 16279      | 11253        | 21524        |
| 25715      | 13112       | 31310            | 0,5     |  | 61842       | 66586      | 72998        | 41621        |
| 3332       | 2175        | 3875             | 0,1     |  | 8596        | 7152       | 4478         | 7768         |
| 13686      | 19075       | 14789            | 0,3     |  | 31175       | 16639      | 13725        | 14012        |
| 5670       | 10849       | 9224             | 0,2     |  | 15647       | 13359      | 8883         | 10502        |
| 2991       | 4144        | 3979             | 0,1     |  | 7620        | 5620       | 3393         | 5377         |
| 2834       | 916         | 2555             | 0,0     |  | 3944        | 5040       | 3927         | 4553         |
| 6618126    | 3316682     | 5793932          | 100,0   |  | 8359098     | 9189171    | 9478451      | 5924555      |
| 17869      | 6187        | 26144            | 4,2     |  | 22687       | 22611      | 30123        | 29314        |
| 82107      | 14834       | 69361            | 11,0    |  | 76975       | 65473      | 78860        | 110075       |
| 77381      | 37102       | 122367           | 19,4    |  | 95445       | 134296     | 100792       | 173431       |
| 271563     | 75638       | 378959           | 60,2    |  | 313098      | 722411     | 470759       | 633167       |
| 23495      | 8433        | 32752            | 5,2     |  | 42281       | 93242      | 51616        | 106642       |
| 472415     | 142194      | 629584           | 100,0   |  | 550486      | 1038033    | 732149       | 1052629      |
| 1516       | 353         | 1214             |         |  | 691         | 663        | 869          | 926          |
|            |             | 1214             | 100,0   |  |             |            |              |              |
| 34849      | 2104        | 15660            | 9,6     |  | 3961        | 4214       | 3277         | 3517         |
| 6249       | 563         | 3197             | 2,0     |  | 669         | 985        | 721          | 704          |
| 2945       | 1587        | 2216             | 1,4     |  | 3679        | 2466       | 1064         | 2998         |
| 3851       | 2761        | 3208             | 2,0     |  | 5920        | 4358       | 3881         | 4906         |
| 69399      | 54052       | 47312            | 29,0    |  | 120516      | 71998      | 75210        | 105775       |
| 14399      | 5565        | 7272             | 4,5     |  | 11147       | 7057       | 8284         | 12306        |
| 5027       | 4500        | 5212             | 3,2     |  | 6506        | 6983       | 6731         | 7333         |
| 6056       | 5479        | 5885             | 3,6     |  | 7195        | 5097       | 9357         | 5095         |
| 1137       | 473         | 857              | 0,5     |  | 1262        | 1430       | 575          | 2616         |
| 2548       | 2493        | 2547             | 1,6     |  | 4689        | 2825       | 1621         | 4018         |
| 3579       | 3956        | 4075             | 2,5     |  | 16481       | 6083       | 2405         | 11408        |

|        |        |        |       |        |        |        |        |
|--------|--------|--------|-------|--------|--------|--------|--------|
| 3824   | 5125   | 3851   | 2,4   | 7148   | 4180   | 1727   | 6686   |
| 809    | 1828   | 1392   | 0,9   | 4592   | 2001   | 2000   | 4751   |
| 4353   | 15178  | 11927  | 7,3   | 17373  | 13439  | 12193  | 13201  |
| 34556  | 80437  | 39185  | 24,0  | 68761  | 61487  | 22697  | 48644  |
| 8103   | 12910  | 8720   | 5,3   | 37007  | 14742  | 3161   | 20062  |
| 676    | 991    | 720    | 0,4   | 1603   | 1110   | 400    | 947    |
| 202361 | 200003 | 163235 | 100,0 | 318508 | 210454 | 155304 | 254965 |
| 5185   | 3099   | 5176   | 60,2  | 7378   | 8863   | 6414   | 10561  |
| 4246   | 1851   | 3416   | 39,8  | 8055   | 4418   | 2661   | 9146   |
| 9431   | 4951   | 8592   | 100,0 | 15434  | 13281  | 9076   | 19707  |
| 7074   | 633    | 4974   | 11,8  | 3497   | 5084   | 10520  | 6335   |
| 26010  | 2746   | 21577  | 51,1  | 13756  | 29166  | 40717  | 14505  |
| 25402  | 1693   | 15700  | 37,2  | 18251  | 19473  | 25798  | 19970  |
| 58487  | 5072   | 42251  | 100,0 | 35504  | 53723  | 77035  | 40810  |
| 1323   | 183    | 1269   | 13,6  | 665    | 2253   | 1308   | 1333   |
| 1723   | 1317   | 2224   | 23,8  | 2780   | 3514   | 1636   | 3741   |
| 1049   | 235    | 730    | 7,8   | 503    | 1135   | 618    | 601    |
| 812    | 363    | 826    | 8,8   | 579    | 1012   | 888    | 424    |
| 259    | 137    | 1964   | 21,0  | 1623   | 761    | 294    | 2511   |
| 4057   | 1179   | 2343   | 25,0  | 1531   | 2336   | 1011   | 2187   |
| 9222   | 3414   | 9356   | 100,0 | 7681   | 11011  | 5754   | 10797  |
| 5080   | 481    | 2038   | 0,1   | 1349   | 1529   | 1098   | 810    |
| 12251  | 1272   | 3724   | 0,3   | 1025   | 2961   | 2303   | 1083   |
| 22409  | 1858   | 6674   | 0,5   | 3453   | 5193   | 5125   | 2088   |
| 14491  | 1468   | 4587   | 0,3   | 1465   | 4565   | 2673   | 1781   |
| 133611 | 3969   | 31080  | 2,2   | 6121   | 16501  | 14145  | 4522   |
| 93753  | 4022   | 27517  | 1,9   | 12915  | 13810  | 17893  | 6032   |
| 18133  | 2986   | 5789   | 0,4   | 1894   | 5236   | 3984   | 2337   |
| 21993  | 3089   | 7691   | 0,5   | 3670   | 5718   | 4577   | 3328   |
| 6895   | 983    | 2587   | 0,2   | 1240   | 3595   | 2066   | 1224   |
| 127541 | 4556   | 32435  | 2,3   | 7293   | 26336  | 14840  | 4614   |
| 425430 | 9769   | 115719 | 8,1   | 34579  | 69980  | 69365  | 10879  |
| 168669 | 10319  | 53115  | 3,7   | 53818  | 31931  | 41510  | 16105  |
| 15706  | 1919   | 5248   | 0,4   | 2010   | 4974   | 3025   | 1955   |
| 67669  | 3087   | 19446  | 1,4   | 5959   | 9293   | 6242   | 3661   |
| 26831  | 1894   | 9132   | 0,6   | 4422   | 4823   | 4167   | 2546   |
| 2601   | 980    | 1462   | 0,1   | 1114   | 2201   | 1834   | 1023   |
| 54551  | 4948   | 17308  | 1,2   | 8148   | 18420  | 14332  | 7425   |
| 545032 | 22267  | 161375 | 11,3  | 52779  | 147689 | 103945 | 28103  |
| 714274 | 29626  | 203471 | 14,3  | 132601 | 156843 | 161315 | 31385  |
| 114305 | 12154  | 47526  | 3,3   | 53277  | 31180  | 37458  | 16229  |
| 5605   | 862    | 2184   | 0,2   | 1362   | 2864   | 1502   | 1041   |
| 50003  | 2120   | 15180  | 1,1   | 5348   | 10668  | 5337   | 2508   |
| 51466  | 2588   | 17134  | 1,2   | 8215   | 8892   | 7723   | 3174   |
| 2897   | 1959   | 2356   | 0,2   | 3250   | 3442   | 5753   | 3047   |
| 9275   | 6047   | 7452   | 0,5   | 9789   | 11011  | 18382  | 10315  |
| 23557  | 12899  | 16020  | 1,1   | 20075  | 23443  | 37743  | 20910  |
| 199566 | 23057  | 72854  | 5,1   | 43851  | 102954 | 78952  | 35053  |
| 660552 | 39804  | 196639 | 13,8  | 116763 | 308464 | 221267 | 48461  |
| 216284 | 13523  | 89759  | 6,3   | 69616  | 77766  | 74171  | 18685  |
| 25964  | 4449   | 17867  | 1,3   | 24221  | 10375  | 12798  | 8052   |
| 13069  | 1412   | 5031   | 0,4   | 2494   | 5265   | 3657   | 2363   |



|         |        |         |       |        |         |         |        |
|---------|--------|---------|-------|--------|---------|---------|--------|
| 30711   | 2710   | 11965   | 0,8   | 6036   | 12163   | 8662    | 3983   |
| 9503    | 5894   | 6889    | 0,5   | 8050   | 9460    | 12770   | 8250   |
| 15332   | 9021   | 10478   | 0,7   | 11993  | 14535   | 18480   | 12049  |
| 36648   | 14767  | 20997   | 1,5   | 23179  | 30087   | 29695   | 20816  |
| 158917  | 36561  | 71667   | 5,0   | 59778  | 151489  | 82196   | 52131  |
| 115918  | 11611  | 48154   | 3,4   | 33804  | 67815   | 41353   | 16100  |
| 27815   | 2834   | 14691   | 1,0   | 16240  | 13744   | 10779   | 4307   |
| 5782    | 2892   | 3619    | 0,3   | 2727   | 4342    | 1772    | 1315   |
| 6700    | 2047   | 3415    | 0,2   | 2886   | 3749    | 2218    | 1402   |
| 5482    | 1408   | 2969    | 0,2   | 3239   | 3788    | 2433    | 1874   |
| 15690   | 1422   | 6644    | 0,5   | 4375   | 9482    | 6032    | 2289   |
| 16138   | 1295   | 6374    | 0,4   | 5383   | 8216    | 4848    | 2347   |
| 6684    | 679    | 3460    | 0,2   | 3520   | 3357    | 2220    | 1093   |
| 4549    | 1117   | 1955    | 0,1   | 1171   | 3325    | 787     | 453    |
| 2316    | 771    | 1398    | 0,1   | 1054   | 2168    | 747     | 524    |
| 1810    | 403    | 935     | 0,1   | 796    | 1418    | 618     | 472    |
| 4938    | 506    | 1977    | 0,1   | 1679   | 3601    | 1535    | 726    |
| 6629    | 658    | 3012    | 0,2   | 2710   | 4158    | 1800    | 896    |
| 4934    | 554    | 3514    | 0,2   | 3998   | 2813    | 1516    | 811    |
| 3589    | 445    | 1993    | 0,1   | 2298   | 2955    | 902     | 642    |
| 4329549 | 327963 | 1426506 | 100,0 | 889031 | 1480587 | 1210547 | 433218 |
| 11330   | 1753   | 7580    | 7,8   | 6372   | 12174   | 14044   | 5608   |
| 9483    | 2875   | 7078    | 7,3   | 10056  | 9257    | 7362    | 12018  |
| 19401   | 3121   | 15539   | 16,1  | 15408  | 33859   | 19391   | 19653  |
| 11299   | 6328   | 12148   | 12,5  | 18463  | 14821   | 13933   | 18584  |
| 11082   | 1956   | 8010    | 8,3   | 6096   | 13339   | 9538    | 7808   |
| 3789    | 1134   | 3641    | 3,8   | 5139   | 6990    | 4209    | 7675   |
| 25331   | 51530  | 42814   | 44,2  | 44875  | 54262   | 50021   | 65896  |
| 91716   | 68698  | 96811   | 100,0 | 106409 | 144701  | 118498  | 137241 |
|         |        |         |       |        |         |         |        |
| 21433   | 2386   | 9674    | 4,4   | 9087   | 7609    | 15154   | 3264   |
| 69926   | 3601   | 34897   | 15,9  | 15531  | 28220   | 58461   | 4877   |
| 64800   | 10006  | 35537   | 16,1  | 39046  | 42599   | 65826   | 14871  |
| 3840    | 4183   | 3720    | 1,7   | 8876   | 3776    | 4183    | 4285   |
| 9132    | 3249   | 7277    | 3,3   | 7238   | 6135    | 9037    | 2780   |
| 66344   | 40262  | 66342   | 30,1  | 85690  | 92220   | 109466  | 49026  |
| 16603   | 20972  | 18390   | 8,4   | 25327  | 23557   | 25527   | 16977  |
| 6067    | 22746  | 13024   | 5,9   | 30708  | 16797   | 8701    | 21819  |
| 5824    | 6123   | 6028    | 2,7   | 10648  | 5271    | 6242    | 4876   |
| 8406    | 2982   | 6201    | 2,8   | 6132   | 7362    | 12782   | 2903   |
| 15308   | 18570  | 16791   | 7,6   | 19293  | 18919   | 18121   | 16431  |
| 2280    | 2230   | 2201    | 1,0   | 3704   | 2957    | 2869    | 2114   |
| 289963  | 137307 | 220082  | 100,0 | 261281 | 255421  | 336370  | 144224 |
| 31554   | 1176   | 10773   | 5,5   | 5676   | 4877    | 21724   | 1555   |
| 4139    | 1107   | 2248    | 1,1   | 1656   | 1864    | 5495    | 534    |
| 146008  | 14811  | 67564   | 34,5  | 58136  | 47529   | 212331  | 13416  |
| 1505    | 507    | 985     | 0,5   | 1152   | 1065    | 1727    | 482    |
| 2679    | 9259   | 4791    | 2,4   | 10781  | 4890    | 8180    | 4887   |
| 9364    | 22462  | 13207   | 6,7   | 36551  | 17100   | 26718   | 19420  |
| 25028   | 5260   | 16746   | 8,6   | 13574  | 17196   | 58865   | 4998   |
| 26946   | 5291   | 16357   | 8,4   | 20083  | 27509   | 72023   | 6482   |
| 13218   | 13577  | 10920   | 5,6   | 34530  | 13394   | 34341   | 18824  |

|        |        |        |       |        |        |        |        |
|--------|--------|--------|-------|--------|--------|--------|--------|
| 11452  | 20617  | 13452  | 6,9   | 29617  | 15911  | 36090  | 20943  |
| 5703   | 30419  | 12051  | 6,2   | 24521  | 15211  | 14379  | 17549  |
| 2824   | 7585   | 3956   | 2,0   | 9538   | 5330   | 4774   | 5402   |
| 5524   | 1613   | 2986   | 1,5   | 2689   | 3469   | 6377   | 2075   |
| 4798   | 1454   | 2344   | 1,2   | 2516   | 4969   | 7548   | 1492   |
| 4516   | 3484   | 3761   | 1,9   | 7305   | 5556   | 12627  | 3986   |
| 3602   | 7168   | 4576   | 2,3   | 15241  | 7653   | 16605  | 9603   |
| 6132   | 10639  | 6576   | 3,4   | 12391  | 10979  | 13375  | 11252  |
| 2309   | 4785   | 2557   | 1,3   | 4136   | 4757   | 3744   | 3222   |
| 307302 | 161216 | 195850 | 100,0 | 290093 | 209260 | 556922 | 146125 |
| 1758   | 535    | 1165   | 11,5  | 526    | 623    | 735    | 664    |
| 3794   | 390    | 3507   | 34,7  | 1228   | 1149   | 2220   | 696    |
| 5040   | 2357   | 3606   | 35,7  | 3508   | 2037   | 4010   | 4410   |
| 1735   | 1639   | 1816   | 18,0  | 2104   | 1166   | 745    | 2697   |
| 12327  | 4921   | 10094  | 100,0 | 7366   | 4975   | 7710   | 8467   |
| 2616   | 760    | 2328   | 1,4   | 2970   | 5271   | 3948   | 3831   |
| 13429  | 1996   | 11017  | 6,6   | 7746   | 22566  | 18947  | 8027   |
| 11865  | 5930   | 12767  | 7,7   | 16623  | 38332  | 20423  | 21795  |
| 3072   | 2958   | 3172   | 1,9   | 14348  | 2650   | 6113   | 4570   |
| 4298   | 2640   | 3983   | 2,4   | 11413  | 6159   | 5805   | 5533   |
| 33242  | 6746   | 27197  | 16,3  | 26433  | 68741  | 63639  | 30568  |
| 17367  | 7209   | 22566  | 13,5  | 18652  | 56342  | 50723  | 66018  |
| 11800  | 13203  | 14239  | 8,5   | 32546  | 20604  | 29020  | 17406  |
| 26937  | 34792  | 30265  | 18,2  | 72758  | 19359  | 61593  | 40845  |
| 15361  | 18285  | 16187  | 9,7   | 35929  | 13170  | 26252  | 26859  |
| 8135   | 5797   | 7806   | 4,7   | 11342  | 14656  | 19015  | 15128  |
| 3528   | 6269   | 4116   | 2,5   | 8993   | 5296   | 9107   | 5775   |
| 4523   | 9917   | 5302   | 3,2   | 9141   | 4083   | 9936   | 7530   |
| 2068   | 4238   | 2785   | 1,7   | 4253   | 2555   | 5163   | 3462   |
| 2643   | 3555   | 2989   | 1,8   | 4604   | 3850   | 4309   | 4871   |
| 160882 | 124295 | 166719 | 100,0 | 277752 | 283635 | 333992 | 262216 |
| 1201   | 4411   | 2286   | 10,6  | 4969   | 2415   | 4074   | 2564   |
| 5100   | 4899   | 4235   | 19,7  | 15929  | 5531   | 14984  | 8150   |
| 4678   | 9755   | 6132   | 28,5  | 12657  | 7479   | 15134  | 8927   |
| 1716   | 358    | 1074   | 5,0   | 1252   | 2929   | 2004   | 1191   |
| 1621   | 1654   | 1736   | 8,1   | 4070   | 3478   | 5896   | 2078   |
| 1662   | 3880   | 2174   | 10,1  | 8554   | 4668   | 4728   | 4833   |
| 869    | 482    | 648    | 3,0   | 954    | 1628   | 1587   | 877    |
| 5579   | 2049   | 3242   | 15,1  | 6329   | 6442   | 7182   | 3485   |
| 22425  | 27488  | 21528  | 100,0 | 54714  | 34570  | 55589  | 32106  |
| 12075  | 4824   | 8928   | 9,0   | 12073  | 10256  | 10521  | 8668   |
| 6986   | 4127   | 8162   | 8,2   | 6984   | 14853  | 8649   | 7051   |
| 33952  | 57748  | 47144  | 47,6  | 64031  | 69862  | 48885  | 45415  |
| 4424   | 2484   | 4174   | 4,2   | 2551   | 3543   | 4953   | 2048   |
| 2667   | 2688   | 2678   | 2,7   | 3246   | 3334   | 3929   | 4038   |
| 14949  | 7204   | 11612  | 11,7  | 14559  | 19259  | 12998  | 12479  |
| 1497   | 2803   | 2230   | 2,3   | 3382   | 3513   | 1712   | 3054   |
| 15146  | 9421   | 14086  | 14,2  | 18533  | 27640  | 18318  | 18706  |
| 91696  | 91299  | 99014  | 100,0 | 125358 | 152259 | 109965 | 101458 |
| 39213  | 9985   | 20421  | 48,3  | 32818  | 28911  | 48540  | 66029  |
| 1782   | 915    | 1208   | 2,9   | 1328   | 1768   | 2340   | 1749   |

|         |         |         |       |         |         |         |         |
|---------|---------|---------|-------|---------|---------|---------|---------|
| 6977    | 1880    | 4301    | 10,2  | 5148    | 6256    | 14487   | 10338   |
| 2133    | 738     | 1675    | 4,0   | 2378    | 2471    | 1922    | 5178    |
| 3925    | 1663    | 2809    | 6,6   | 6126    | 3989    | 3013    | 16245   |
| 17295   | 10162   | 11877   | 28,1  | 33958   | 19665   | 8996    | 40752   |
| 71325   | 25344   | 42292   | 100,0 | 81756   | 63061   | 79299   | 140291  |
| 312735  | 88790   | 126578  | 3,2   | 54267   | 73047   | 39674   | 51459   |
| 29876   | 63269   | 41854   | 1,0   | 26861   | 44335   | 23325   | 32193   |
| 59611   | 38274   | 39936   | 1,0   | 30816   | 48947   | 43437   | 25827   |
| 1545828 | 1620903 | 1245692 | 31,0  | 816128  | 1347666 | 1084434 | 1108620 |
| 13047   | 12857   | 11520   | 0,3   | 7947    | 10508   | 7858    | 6678    |
| 63903   | 118656  | 64221   | 1,6   | 31929   | 57376   | 56138   | 43172   |
| 39326   | 33475   | 29384   | 0,7   | 21481   | 30701   | 36693   | 19343   |
| 668634  | 286374  | 368452  | 9,2   | 312009  | 305611  | 460166  | 164496  |
| 2602617 | 2216888 | 1900550 | 47,3  | 1039029 | 1474105 | 1631750 | 1451934 |
| 6391    | 11421   | 5989    | 0,1   | 8002    | 7243    | 3829    | 4020    |
| 16010   | 21694   | 15915   | 0,4   | 9417    | 14802   | 10216   | 13200   |
| 6579    | 54631   | 16441   | 0,4   | 4358    | 2098    | 15977   | 1357    |
| 3299    | 11084   | 4744    | 0,1   | 5513    | 1924    | 5484    | 1744    |
| 3927    | 4690    | 3610    | 0,1   | 7119    | 3332    | 6039    | 2453    |
| 19818   | 9619    | 13385   | 0,3   | 15607   | 14072   | 20450   | 11185   |
| 81900   | 53056   | 55187   | 1,4   | 23400   | 41290   | 33934   | 31178   |
| 12138   | 11196   | 11779   | 0,3   | 4538    | 10012   | 5602    | 5811    |
| 2657    | 12959   | 4270    | 0,1   | 5417    | 2171    | 4506    | 1483    |
| 3596    | 16888   | 6331    | 0,2   | 5397    | 1229    | 7805    | 1153    |
| 1865    | 5980    | 3076    | 0,1   | 2779    | 1613    | 3553    | 1250    |
| 841     | 1481    | 961     | 0,0   | 1408    | 735     | 1027    | 880     |
| 1195    | 1098    | 1145    | 0,0   | 1678    | 1728    | 2061    | 1187    |
| 5187    | 2593    | 4288    | 0,1   | 5013    | 5125    | 4847    | 3978    |
| 41206   | 37917   | 39781   | 1,0   | 17445   | 32628   | 31266   | 24435   |
| 5542185 | 4735793 | 4015087 | 100,0 | 2457560 | 3532298 | 3540070 | 3009036 |

| MM          | MM            | MM         | MM             | MM            | MM            | Metastatic Melanoma |         |
|-------------|---------------|------------|----------------|---------------|---------------|---------------------|---------|
| HS294T (P9) | SK-MEL-3 (P6) | A2058 (P6) | RPMI 7951 (P6) | Colo-800 (P5) | Colo-800 (P6) | Mean                | % Class |
| 29000       | 60132         | 48635      | 26927          | 58945         | 61671         | 42899               | 0,5     |
| 248314      | 825282        | 387028     | 159166         | 572890        | 499937        | 383331              | 4,9     |
| 47992       | 45718         | 63326      | 54720          | 50279         | 46457         | 49845               | 0,6     |
| 30960       | 32621         | 44024      | 21057          | 67490         | 72423         | 37987               | 0,5     |
| 841412      | 1370150       | 1190260    | 811563         | 1427266       | 1329769       | 1094195             | 13,9    |
| 233427      | 508519        | 294053     | 189987         | 360286        | 348777        | 313143              | 4,0     |
| 545339      | 678518        | 761558     | 479912         | 685681        | 672792        | 588142              | 7,5     |
| 2712947     | 3733089       | 3360352    | 2485634        | 3063273       | 2495320       | 2904301             | 37,0    |
| 35126       | 53089         | 67628      | 42001          | 19828         | 14285         | 41761               | 0,5     |
| 54542       | 48839         | 81891      | 53199          | 46915         | 33487         | 53318               | 0,7     |
| 30702       | 23427         | 48147      | 30992          | 25683         | 25228         | 36119               | 0,5     |
| 141420      | 76823         | 171240     | 121582         | 128612        | 147945        | 124264              | 1,6     |
| 1318803     | 1518074       | 1661370    | 1276795        | 1307503       | 1313425       | 1335677             | 17,0    |
| 1094535     | 905958        | 699731     | 540998         | 332283        | 255000        | 676995              | 8,6     |
| 36166       | 36677         | 73891      | 36582          | 21213         | 18805         | 43521               | 0,6     |
| 36419       | 12265         | 19072      | 21506          | 34564         | 34576         | 23544               | 0,3     |
| 58732       | 69549         | 41157      | 56325          | 49966         | 36720         | 54309               | 0,7     |
| 6392        | 5618          | 7779       | 9591           | 3538          | 2540          | 6306                | 0,1     |
| 14358       | 12794         | 20184      | 8614           | 7685          | 5962          | 14097               | 0,2     |
| 8705        | 7745          | 23711      | 7858           | 5251          | 5270          | 10900               | 0,1     |
| 5898        | 2911          | 8652       | 4070           | 6554          | 5832          | 5450                | 0,1     |
| 5027        | 4459          | 5112       | 7034           | 3201          | 2627          | 4407                | 0,1     |
| 7536220     | 10032257      | 9078800    | 6446114        | 8278906       | 7428847       | 8175242             | 100,0   |
| 16467       | 39856         | 19455      | 29989          | 39032         | 41304         | 26487               | 3,2     |
| 57496       | 62385         | 52173      | 147365         | 96156         | 100006        | 78761               | 9,4     |
| 64216       | 144655        | 80623      | 179431         | 126339        | 128857        | 115834              | 13,8    |
| 331833      | 598140        | 480911     | 842687         | 361059        | 359481        | 492881              | 58,7    |
| 52452       | 64478         | 71894      | 158530         | 65504         | 58227         | 72375               | 8,6     |
| 522464      | 909513        | 705057     | 1358001        | 688088        | 687876        | 824430              | 100,0   |
| 2339        | 2309          | 710        | 929            | 789           | 1549          | 1178                |         |
|             |               |            |                |               |               | 1178                | 100,0   |
| 2967        | 3002          | 3863       | 3428           | 4589          | 4146          | 3696                | 1,5     |
| 584         | 634           | 961        | 631            | 860           | 813           | 756                 | 0,3     |
| 2753        | 1306          | 3442       | 2718           | 2004          | 1953          | 2438                | 1,0     |
| 4090        | 3677          | 5141       | 4436           | 3056          | 3022          | 4249                | 1,8     |
| 102565      | 75942         | 86364      | 96674          | 108767        | 85397         | 92921               | 38,6    |
| 9881        | 8866          | 9610       | 11098          | 13315         | 10630         | 10219               | 4,2     |
| 6584        | 5530          | 7951       | 6850           | 6801          | 5710          | 6698                | 2,8     |
| 5971        | 9239          | 5805       | 4870           | 14353         | 11182         | 7816                | 3,2     |
| 883         | 934           | 1679       | 2430           | 1196          | 873           | 1388                | 0,6     |
| 3829        | 1548          | 3512       | 3601           | 9860          | 7099          | 4260                | 1,8     |
| 10444       | 2071          | 9744       | 9091           | 9915          | 6424          | 8407                | 3,5     |

|        |        |        |        |        |        |        |       |
|--------|--------|--------|--------|--------|--------|--------|-------|
| 6184   | 1897   | 5711   | 5689   | 8639   | 6463   | 5432   | 2,3   |
| 2678   | 561    | 3808   | 1859   | 1296   | 1064   | 2461   | 1,0   |
| 17466  | 13407  | 13730  | 13737  | 12438  | 10499  | 13748  | 5,7   |
| 54903  | 19868  | 74694  | 43169  | 124013 | 81823  | 60006  | 24,9  |
| 23297  | 2647   | 20315  | 16040  | 9374   | 6402   | 15305  | 6,4   |
| 1219   | 426    | 1302   | 680    | 2006   | 1518   | 1121   | 0,5   |
| 256297 | 151556 | 257633 | 227000 | 332483 | 245018 | 240922 | 100,0 |
| 7228   | 4257   | 8107   | 6360   | 5722   | 8716   | 7780   | 60,9  |
| 5584   | 3175   | 6252   | 5412   | 3114   | 2397   | 4993   | 39,1  |
| 12812  | 7432   | 14359  | 11772  | 8836   | 11113  | 12773  | 100,0 |
| 3965   | 8166   | 4788   | 7613   | 5635   | 5587   | 6119   | 13,0  |
| 17765  | 31973  | 21824  | 15139  | 24243  | 25101  | 23419  | 49,6  |
| 15411  | 20507  | 19526  | 18463  | 9934   | 9219   | 17655  | 37,4  |
| 37141  | 60646  | 46138  | 41214  | 39812  | 39907  | 47193  | 100,0 |
| 739    | 1026   | 1433   | 1568   | 1058   | 1159   | 1254   | 16,2  |
| 2283   | 1222   | 2703   | 2316   | 2354   | 2467   | 2502   | 32,2  |
| 634    | 797    | 701    | 765    | 556    | 768    | 708    | 9,1   |
| 518    | 904    | 871    | 571    | 1003   | 806    | 757    | 9,8   |
| 1389   | 245    | 623    | 807    | 109    | 72     | 843    | 10,9  |
| 1287   | 859    | 3766   | 1879   | 1321   | 761    | 1694   | 21,8  |
| 6850   | 5053   | 10097  | 7906   | 6400   | 6033   | 7758   | 100,0 |
| 966    | 1052   | 1412   | 822    | 885    | 1433   | 1136   | 0,1   |
| 2111   | 1836   | 3425   | 1489   | 1676   | 1500   | 1941   | 0,2   |
| 3628   | 4735   | 5008   | 2635   | 2512   | 2069   | 3645   | 0,4   |
| 3487   | 2550   | 4277   | 2120   | 2879   | 2511   | 2831   | 0,3   |
| 14683  | 15413  | 13978  | 6525   | 8857   | 7115   | 10786  | 1,1   |
| 19969  | 19040  | 13266  | 7341   | 9658   | 7825   | 12775  | 1,3   |
| 4005   | 2546   | 6939   | 3776   | 2517   | 2234   | 3547   | 0,4   |
| 3922   | 2828   | 7514   | 4295   | 2577   | 2054   | 4048   | 0,4   |
| 2138   | 1693   | 2908   | 1706   | 1909   | 1824   | 2030   | 0,2   |
| 17135  | 17425  | 14058  | 6786   | 11801  | 10055  | 13034  | 1,3   |
| 89850  | 86268  | 42119  | 17420  | 37648  | 25633  | 48374  | 4,9   |
| 50061  | 45328  | 30081  | 18803  | 20500  | 12847  | 32098  | 3,2   |
| 4099   | 2241   | 5111   | 2401   | 2231   | 1789   | 2984   | 0,3   |
| 10273  | 5831   | 9760   | 4716   | 4026   | 3060   | 6282   | 0,6   |
| 5712   | 3506   | 5266   | 3302   | 2539   | 2034   | 3832   | 0,4   |
| 1381   | 1165   | 1543   | 1349   | 1268   | 1667   | 1455   | 0,1   |
| 15348  | 13702  | 11949  | 8950   | 10570  | 9431   | 11827  | 1,2   |
| 173813 | 129029 | 72225  | 38373  | 59751  | 38882  | 84459  | 8,5   |
| 257613 | 180370 | 101471 | 46791  | 57312  | 29627  | 115533 | 11,6  |
| 65571  | 42748  | 29188  | 20401  | 14766  | 10037  | 32086  | 3,2   |
| 2521   | 1351   | 2444   | 1230   | 1338   | 1014   | 1667   | 0,2   |
| 12204  | 5952   | 7176   | 3340   | 3812   | 2465   | 5881   | 0,6   |
| 14391  | 8733   | 7342   | 3770   | 5002   | 3315   | 7056   | 0,7   |
| 2932   | 4280   | 3153   | 2913   | 2329   | 2645   | 3374   | 0,3   |
| 9779   | 14184  | 10450  | 10086  | 7869   | 7512   | 10938  | 1,1   |
| 24337  | 30307  | 20934  | 20930  | 15506  | 13736  | 22792  | 2,3   |
| 114007 | 86652  | 52659  | 40754  | 42742  | 29644  | 62727  | 6,3   |
| 423687 | 283964 | 146406 | 58772  | 83321  | 43122  | 173423 | 17,4  |
| 195568 | 104385 | 51084  | 23452  | 20822  | 12991  | 64854  | 6,5   |
| 37060  | 16128  | 12983  | 8748   | 4995   | 4299   | 13966  | 1,4   |
| 7549   | 4338   | 3613   | 2144   | 3120   | 2066   | 3661   | 0,4   |

|         |         |        |        |        |        |        |       |
|---------|---------|--------|--------|--------|--------|--------|-------|
| 18942   | 10697   | 8142   | 4985   | 5671   | 3693   | 8298   | 0,8   |
| 8436    | 10129   | 8935   | 8271   | 5815   | 5596   | 8571   | 0,9   |
| 13274   | 15209   | 13456  | 13024  | 8843   | 7635   | 12850  | 1,3   |
| 34103   | 24988   | 26767  | 25385  | 16036  | 11512  | 24257  | 2,4   |
| 169032  | 105910  | 82547  | 56698  | 42784  | 27025  | 82959  | 8,3   |
| 145033  | 59656   | 38862  | 20010  | 17818  | 12269  | 45272  | 4,5   |
| 43770   | 14292   | 11414  | 5509   | 3580   | 2802   | 12644  | 1,3   |
| 4196    | 2552    | 2665   | 1763   | 1443   | 1089   | 2386   | 0,2   |
| 4691    | 2237    | 2653   | 2343   | 1799   | 1402   | 2538   | 0,3   |
| 9161    | 2649    | 2396   | 2694   | 2463   | 2072   | 3277   | 0,3   |
| 24483   | 9663    | 4336   | 3252   | 3605   | 2702   | 7022   | 0,7   |
| 24014   | 7327    | 5348   | 2945   | 2470   | 1938   | 6484   | 0,7   |
| 8846    | 2930    | 3344   | 1893   | 1101   | 914    | 2922   | 0,3   |
| 2006    | 1230    | 1831   | 1009   | 613    | 432    | 1286   | 0,1   |
| 1849    | 844     | 1477   | 1062   | 715    | 557    | 1100   | 0,1   |
| 2402    | 764     | 875    | 845    | 735    | 545    | 947    | 0,1   |
| 7022    | 2167    | 1644   | 817    | 1001   | 773    | 2096   | 0,2   |
| 8813    | 2548    | 2502   | 1193   | 1123   | 911    | 2666   | 0,3   |
| 8539    | 1845    | 2678   | 1080   | 586    | 589    | 2446   | 0,2   |
| 8335    | 1306    | 1897   | 687    | 654    | 497    | 2017   | 0,2   |
| 2136751 | 1418522 | 923511 | 531607 | 564710 | 379958 | 997076 | 100,0 |
| 5321    | 14309   | 9319   | 7145   | 6626   | 8723   | 8964   | 7,0   |
| 8146    | 7457    | 10103  | 11754  | 7927   | 5987   | 9006   | 7,0   |
| 14999   | 17847   | 22948  | 19632  | 18194  | 20731  | 20266  | 15,8  |
| 16167   | 11624   | 18013  | 16913  | 9582   | 7879   | 14598  | 11,4  |
| 9797    | 10157   | 9609   | 9095   | 7760   | 9820   | 9302   | 7,3   |
| 5279    | 4436    | 6790   | 7840   | 2957   | 2817   | 5413   | 4,2   |
| 106472  | 45883   | 74156  | 96658  | 35724  | 33246  | 60719  | 47,3  |
| 166180  | 111712  | 150937 | 169039 | 88769  | 89202  | 128269 | 100,0 |
| 8917    | 14041   | 7414   | 6577   | 12043  | 9908   | 9401   | 3,8   |
| 20942   | 62116   | 17827  | 6075   | 27708  | 27242  | 26900  | 10,8  |
| 39836   | 64159   | 36618  | 18485  | 52320  | 43259  | 41702  | 16,8  |
| 4249    | 4126    | 4868   | 3330   | 4521   | 3201   | 4542   | 1,8   |
| 7716    | 10116   | 6873   | 3460   | 11032  | 8942   | 7333   | 3,0   |
| 101238  | 114738  | 95866  | 48246  | 77798  | 63592  | 83788  | 33,8  |
| 19624   | 22318   | 24966  | 15494  | 20816  | 19533  | 21414  | 8,6   |
| 20457   | 7264    | 23780  | 15061  | 13046  | 11957  | 16959  | 6,8   |
| 10548   | 6113    | 6331   | 4286   | 11935  | 10786  | 7704   | 3,1   |
| 9543    | 13339   | 6116   | 3671   | 11345  | 9661   | 8286   | 3,3   |
| 13735   | 18328   | 16917  | 13015  | 17130  | 13390  | 16528  | 6,7   |
| 3921    | 2792    | 5031   | 1627   | 5912   | 5311   | 3624   | 1,5   |
| 260725  | 339450  | 252609 | 139326 | 265605 | 226782 | 248179 | 100,0 |
| 5319    | 21249   | 4320   | 2850   | 5814   | 5295   | 7868   | 2,8   |
| 847     | 4315    | 1800   | 571    | 2094   | 1472   | 2065   | 0,7   |
| 52511   | 213308  | 46758  | 17236  | 59655  | 49771  | 77065  | 27,9  |
| 895     | 1810    | 1256   | 514    | 813    | 692    | 1041   | 0,4   |
| 4914    | 6712    | 5128   | 5219   | 2381   | 2127   | 5522   | 2,0   |
| 16629   | 26311   | 17773  | 17882  | 21294  | 18324  | 21800  | 7,9   |
| 14031   | 58557   | 14642  | 7546   | 23872  | 20576  | 23386  | 8,5   |
| 17076   | 66867   | 25324  | 8883   | 14354  | 11330  | 26993  | 9,8   |
| 18657   | 28910   | 19733  | 14668  | 26321  | 23791  | 23317  | 8,4   |

|        |        |        |        |        |        |        |       |
|--------|--------|--------|--------|--------|--------|--------|-------|
| 14438  | 33202  | 19231  | 16951  | 22180  | 17895  | 22646  | 8,2   |
| 11952  | 14723  | 22716  | 15374  | 14316  | 13924  | 16467  | 6,0   |
| 6599   | 4745   | 6778   | 6360   | 8461   | 8521   | 6651   | 2,4   |
| 3133   | 7058   | 2895   | 2846   | 5597   | 5404   | 4154   | 1,5   |
| 2578   | 7928   | 4498   | 2411   | 3436   | 3118   | 4049   | 1,5   |
| 5709   | 12137  | 6205   | 3547   | 13303  | 13240  | 8362   | 3,0   |
| 7928   | 15272  | 12549  | 7641   | 9353   | 9028   | 11087  | 4,0   |
| 5405   | 12731  | 14516  | 8469   | 7596   | 6292   | 10301  | 3,7   |
| 2166   | 3495   | 6227   | 2577   | 4272   | 4087   | 3868   | 1,4   |
| 190787 | 539331 | 232349 | 141544 | 245111 | 214890 | 276641 | 100,0 |
| 1196   | 2387   | 526    | 467    | 820    | 1668   | 961    | 8,7   |
| 10043  | 5648   | 974    | 878    | 2324   | 3038   | 2820   | 25,7  |
| 5303   | 10211  | 3350   | 3241   | 3124   | 3533   | 4273   | 38,9  |
| 10540  | 4149   | 970    | 932    | 2520   | 3574   | 2940   | 26,7  |
| 27082  | 22395  | 5820   | 5519   | 8788   | 11812  | 10993  | 100,0 |
| 987    | 2920   | 7264   | 4076   | 3276   | 2801   | 3734   | 1,4   |
| 5256   | 16580  | 17463  | 8518   | 18370  | 18261  | 14173  | 5,2   |
| 7291   | 18583  | 48844  | 20129  | 15541  | 12069  | 21963  | 8,1   |
| 7585   | 5182   | 3582   | 2938   | 4801   | 4303   | 5607   | 2,1   |
| 10530  | 5820   | 5285   | 4799   | 11444  | 11846  | 7863   | 2,9   |
| 23569  | 62004  | 49247  | 33948  | 38838  | 33449  | 43043  | 15,8  |
| 8245   | 57338  | 51283  | 65081  | 13168  | 9161   | 39601  | 14,5  |
| 24483  | 26571  | 25964  | 15606  | 18091  | 17439  | 22773  | 8,4   |
| 63832  | 53413  | 25882  | 34035  | 41386  | 41274  | 45438  | 16,7  |
| 37781  | 24774  | 14807  | 26567  | 47717  | 49828  | 30368  | 11,1  |
| 13485  | 20793  | 10588  | 17617  | 23037  | 20033  | 16569  | 6,1   |
| 5697   | 9369   | 6078   | 4636   | 3817   | 3917   | 6268   | 2,3   |
| 5796   | 9415   | 5615   | 5068   | 4148   | 3856   | 6459   | 2,4   |
| 3253   | 4837   | 3588   | 3056   | 3275   | 3088   | 3653   | 1,3   |
| 5331   | 4152   | 3916   | 4503   | 7506   | 6616   | 4966   | 1,8   |
| 223121 | 321750 | 279404 | 250577 | 254414 | 237940 | 272480 | 100,0 |
| 2491   | 3131   | 2575   | 2562   | 1121   | 1149   | 2705   | 6,6   |
| 8006   | 11898  | 8941   | 6354   | 12100  | 10733  | 10263  | 25,1  |
| 6342   | 14828  | 8052   | 7824   | 9835   | 8283   | 9936   | 24,3  |
| 1328   | 1991   | 1935   | 1241   | 1935   | 1657   | 1746   | 4,3   |
| 3078   | 5635   | 3355   | 1863   | 6821   | 6951   | 4322   | 10,6  |
| 4278   | 4186   | 7393   | 3572   | 4958   | 5026   | 5220   | 12,8  |
| 1700   | 1684   | 1295   | 943    | 1989   | 1596   | 1425   | 3,5   |
| 5122   | 6606   | 9588   | 3227   | 2372   | 1655   | 5201   | 12,7  |
| 32345  | 49958  | 43135  | 27587  | 41132  | 37049  | 40818  | 100,0 |
| 9869   | 12525  | 10034  | 8313   | 15021  | 14439  | 11172  | 9,1   |
| 8289   | 11919  | 8751   | 6282   | 13819  | 13052  | 9965   | 8,1   |
| 63490  | 67657  | 57389  | 28740  | 56216  | 51526  | 55321  | 45,0  |
| 4048   | 4449   | 3886   | 2072   | 4448   | 4295   | 3629   | 3,0   |
| 3826   | 5336   | 2355   | 3177   | 5149   | 5452   | 3984   | 3,2   |
| 14324  | 13097  | 19508  | 12077  | 14543  | 13680  | 14652  | 11,9  |
| 3048   | 1661   | 3131   | 2794   | 2842   | 3124   | 2826   | 2,3   |
| 21278  | 21453  | 25466  | 22556  | 19886  | 19046  | 21288  | 17,3  |
| 128173 | 138097 | 130519 | 86012  | 131923 | 124615 | 122838 | 100,0 |
| 22281  | 42035  | 28622  | 33930  | 27278  | 23923  | 35437  | 49,1  |
| 1040   | 2372   | 1558   | 1500   | 1501   | 1239   | 1640   | 2,3   |

|         |         |         |         |         |         |         |       |
|---------|---------|---------|---------|---------|---------|---------|-------|
| 4045    | 12372   | 5234    | 4712    | 7985    | 6441    | 7702    | 10,7  |
| 1644    | 1226    | 1711    | 2139    | 3122    | 2680    | 2447    | 3,4   |
| 3221    | 2087    | 4650    | 6732    | 3414    | 2570    | 5205    | 7,2   |
| 20076   | 8073    | 30411   | 19355   | 8939    | 7271    | 19750   | 27,4  |
| 52307   | 68166   | 72184   | 68369   | 52239   | 44125   | 72180   | 100,0 |
| 60316   | 63473   | 71544   | 57954   | 30588   | 36757   | 53908   | 1,6   |
| 37510   | 31840   | 56140   | 41749   | 20357   | 24166   | 33848   | 1,0   |
| 75458   | 64706   | 54462   | 32893   | 23617   | 37039   | 43720   | 1,3   |
| 1406564 | 1076936 | 1600158 | 1418778 | 582888  | 900180  | 1134235 | 33,9  |
| 15116   | 10346   | 13684   | 9315    | 5663    | 7129    | 9425    | 0,3   |
| 45409   | 60695   | 62731   | 56673   | 24829   | 33487   | 47244   | 1,4   |
| 46432   | 30208   | 34441   | 23176   | 17046   | 23388   | 28291   | 0,8   |
| 521729  | 700666  | 264680  | 145604  | 152260  | 238108  | 326533  | 9,8   |
| 2106462 | 1353453 | 2213404 | 1954584 | 808468  | 1345892 | 1537908 | 46,0  |
| 6127    | 7051    | 3440    | 4952    | 2424    | 3190    | 5028    | 0,2   |
| 11184   | 10416   | 13884   | 10594   | 5070    | 6987    | 10577   | 0,3   |
| 14648   | 26878   | 1853    | 1002    | 2128    | 5106    | 7541    | 0,2   |
| 17476   | 8074    | 2033    | 1969    | 3290    | 8079    | 5559    | 0,2   |
| 15053   | 9577    | 3217    | 3290    | 5269    | 10543   | 6589    | 0,2   |
| 26215   | 32354   | 11736   | 11817   | 8979    | 12537   | 16495   | 0,5   |
| 41097   | 28173   | 46211   | 34737   | 16947   | 25807   | 32277   | 1,0   |
| 4538    | 5688    | 7027    | 5684    | 2827    | 5031    | 5676    | 0,2   |
| 7199    | 7634    | 1708    | 1076    | 2898    | 2754    | 3684    | 0,1   |
| 6414    | 10869   | 955     | 954     | 1193    | 1992    | 3796    | 0,1   |
| 3950    | 5037    | 1377    | 1211    | 1602    | 2031    | 2440    | 0,1   |
| 2944    | 1123    | 725     | 780     | 1548    | 2168    | 1334    | 0,0   |
| 3221    | 3159    | 1177    | 1250    | 1228    | 1207    | 1790    | 0,1   |
| 6327    | 7332    | 4155    | 3392    | 3681    | 3304    | 4715    | 0,1   |
| 21902   | 24434   | 26842   | 22606   | 11616   | 17899   | 23107   | 0,7   |
| 4503291 | 3580119 | 4497583 | 3846041 | 1736416 | 2754780 | 3345719 | 100,0 |



**Table S2.** Ultra-High Performance Liquid Chromatography (UHPLC) and Mass Spectrometry (MS) analysis settings.

| UHPLC                                                                                                  | MS                                                                                                                       |
|--------------------------------------------------------------------------------------------------------|--------------------------------------------------------------------------------------------------------------------------|
| ACQUITY UPLC (Waters)                                                                                  | Quadrupole time of flight (Q-TOF) model SYNAPT G2 HDMS (Waters)                                                          |
| Pre-column: Acquity UHPLC HSS T3 1.8 $\mu$ m VanGuardT (Waters)                                        | Ionization mode: ESI positive and ESI negative                                                                           |
| Column: Acquity UHPLC HSS T3 2.1x 100 mm, 1.8 $\mu$ m (Waters)                                         | Adquisition mode: continuun MS <sup>E</sup> in resolution mode (FWHM $\approx$ 20,000)                                   |
| Column temperature: 65 $^{\circ}$ C                                                                    | Capilar voltage: 0.7 kV (ESI <sup>+</sup> ) and 0.5 kV (ESI <sup>-</sup> )<br>Cone voltage: 35 V                         |
| Flux: 500 $\mu$ l/min                                                                                  | Source temperature: 120 $^{\circ}$ C<br>Desolvation temperature: 400 $^{\circ}$ C                                        |
| Mobile phase A: acetonitrile/H <sub>2</sub> O (40:60) with 10 mM NH <sub>4</sub> Ac                    | Desolvation gas: argon, 900 l/h<br>Cone gas : argon, 30 l/h                                                              |
| Mobile phase B: acetonitrile/isopropanol (10:90) with 10 mM NH <sub>4</sub> Ac                         | Acquisition range: 50 to 1200 u.                                                                                         |
| Gradient:<br>0-10 min, from 40 to 100% B<br>10-11 min and final re-equilibration of the system, 100% B | Scan time: 0.5 s<br>Inter-scan delay: 0.024 s                                                                            |
| Automatic injector temperature: 4 $^{\circ}$ C<br>Injection volume: 7.5 $\mu$ l                        | Colission energy:<br>Function 1: trap 6 eV and transfer 6 eV<br>Function 2: trap ramp from 15 to 40 eV and transfer 6 eV |

Figure S1

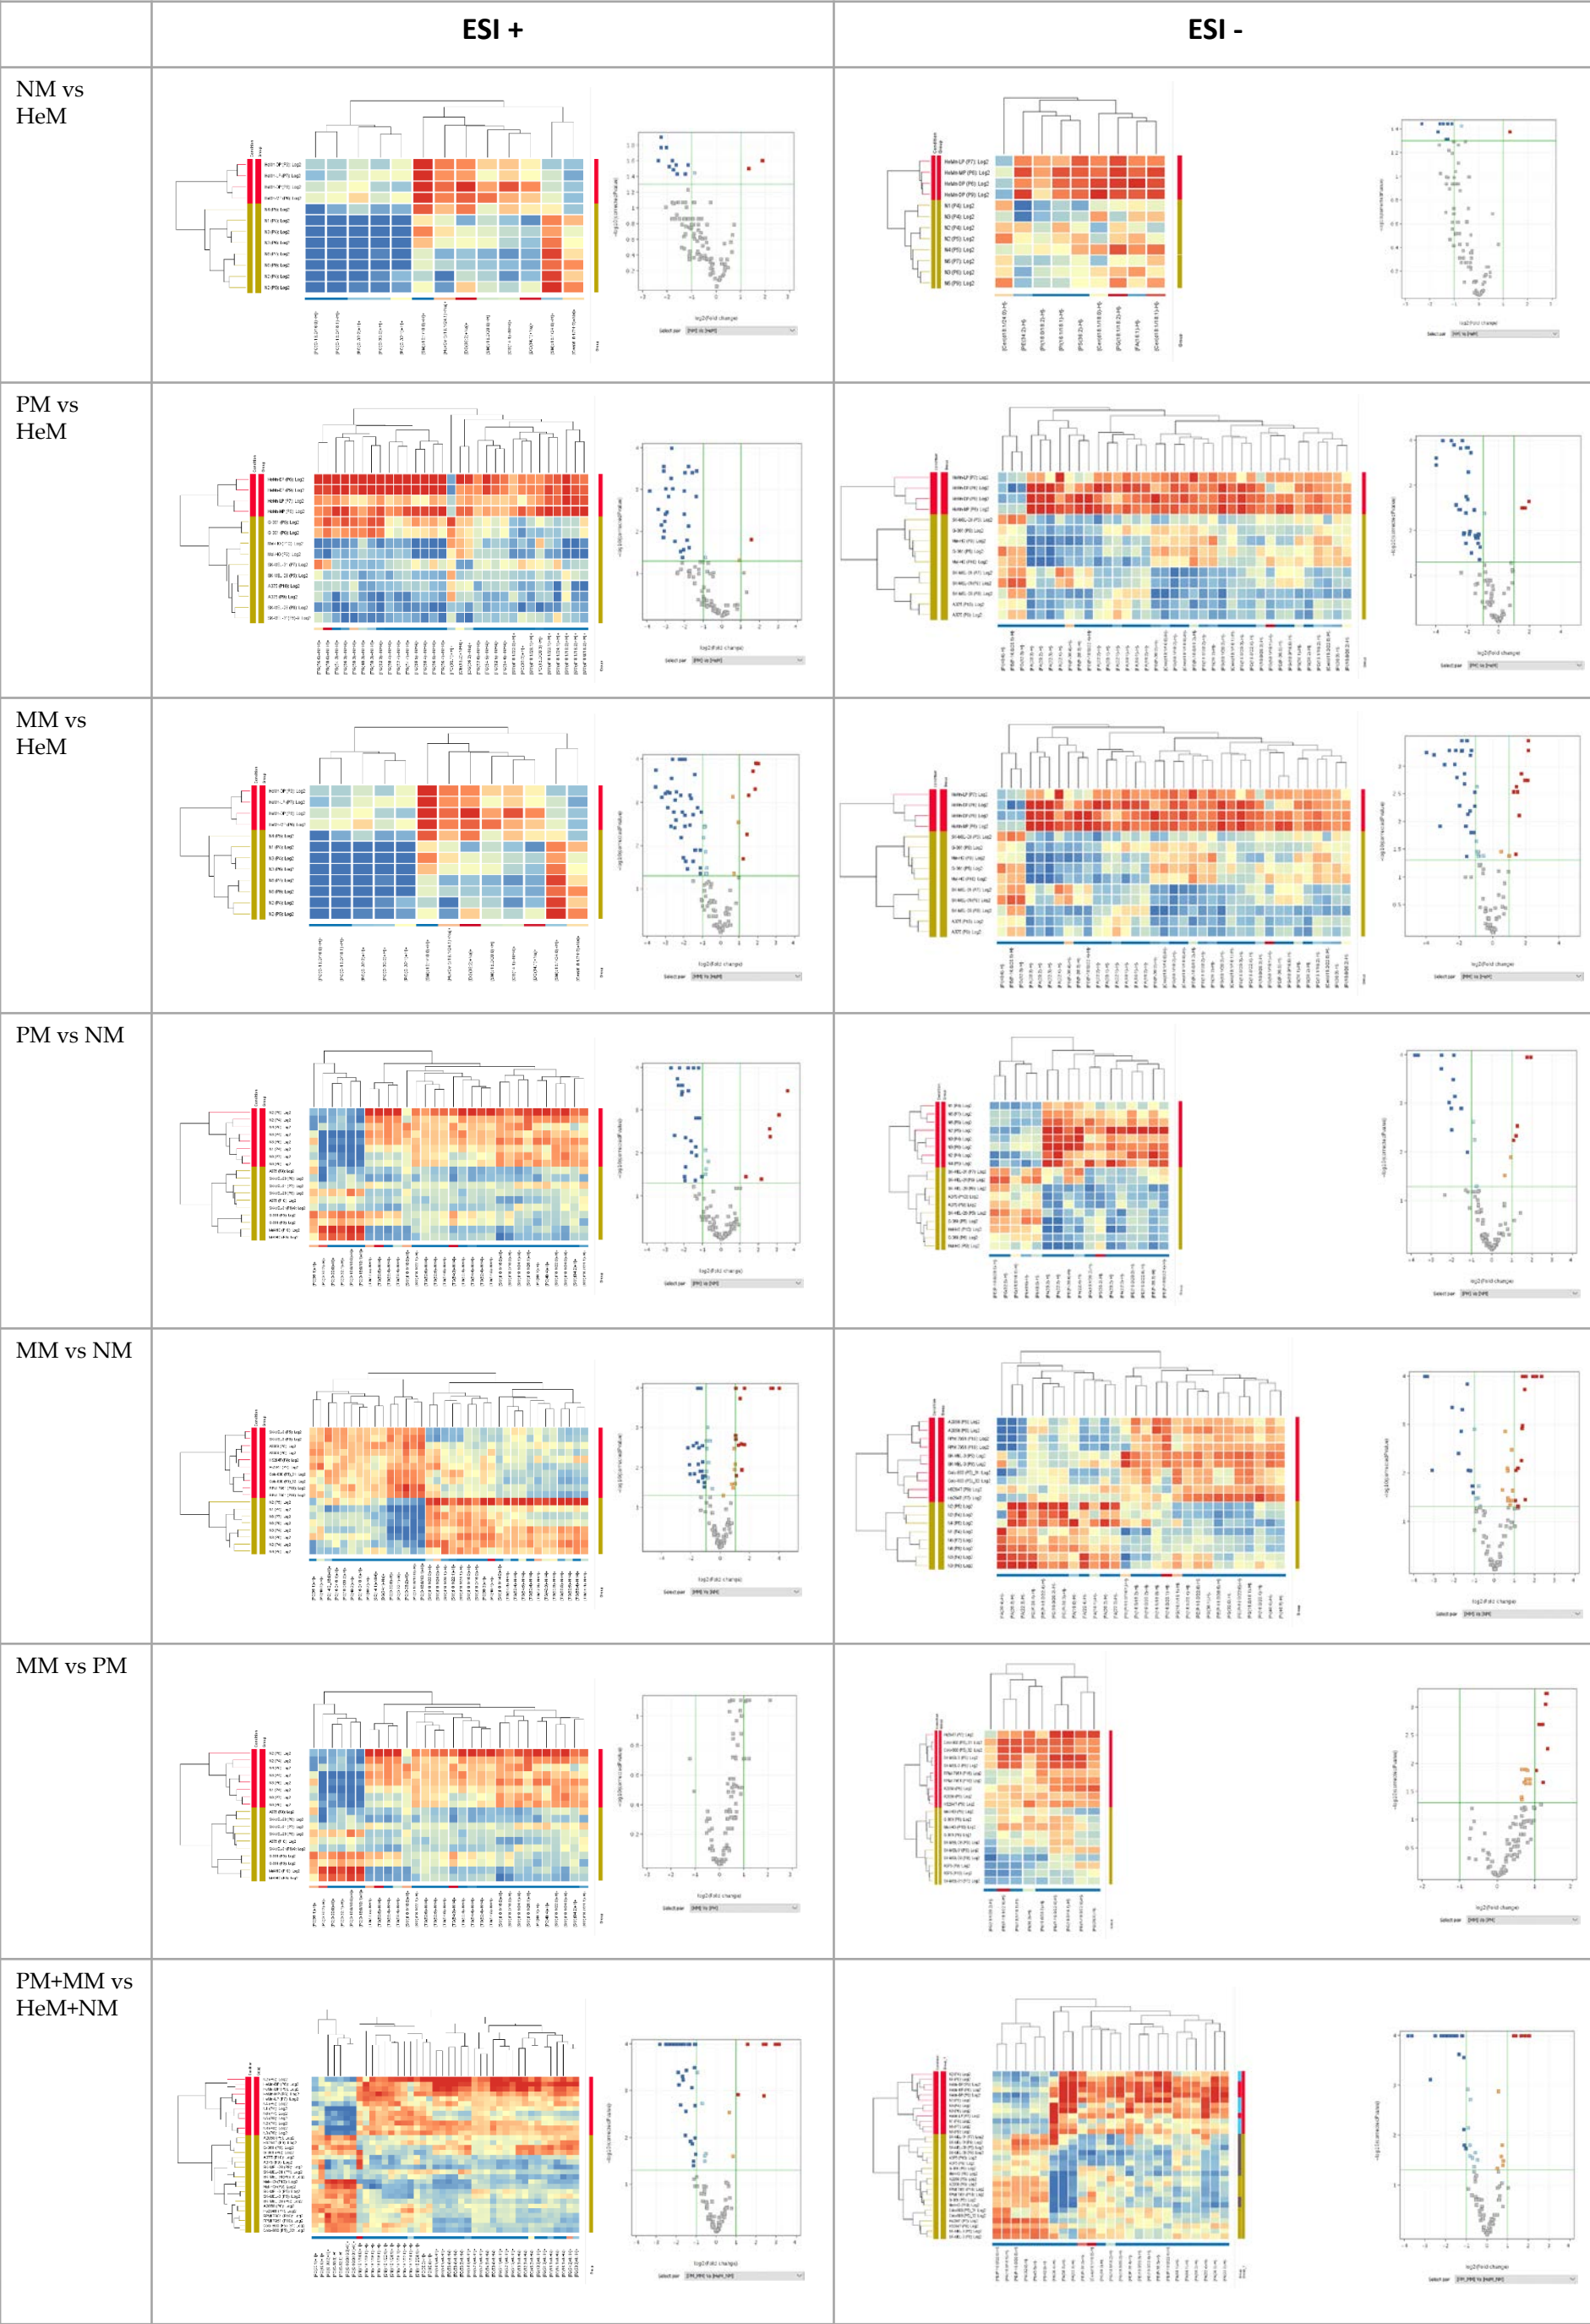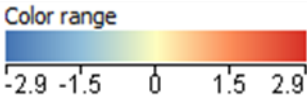

Figure S2

A.

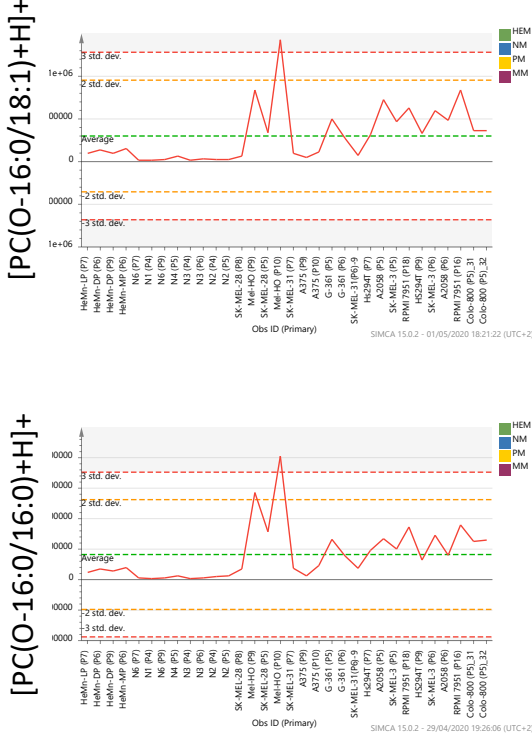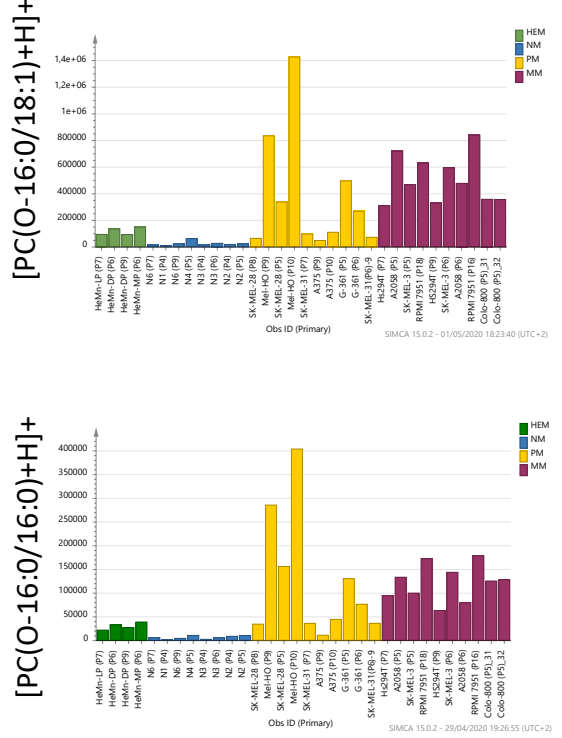

B.

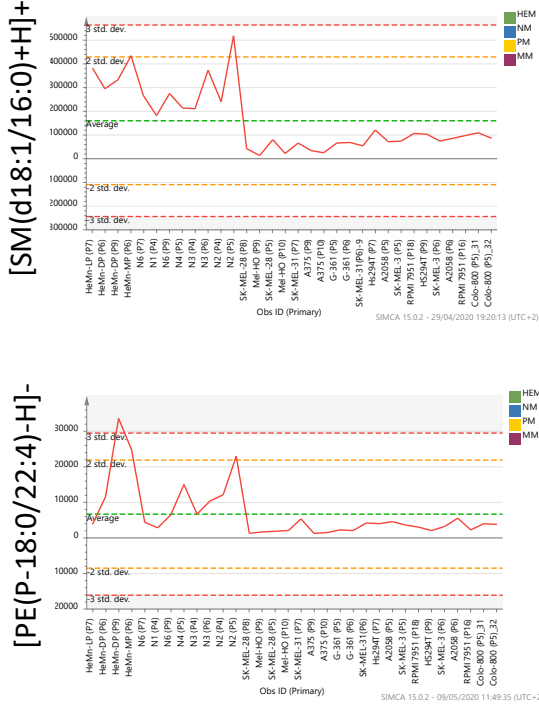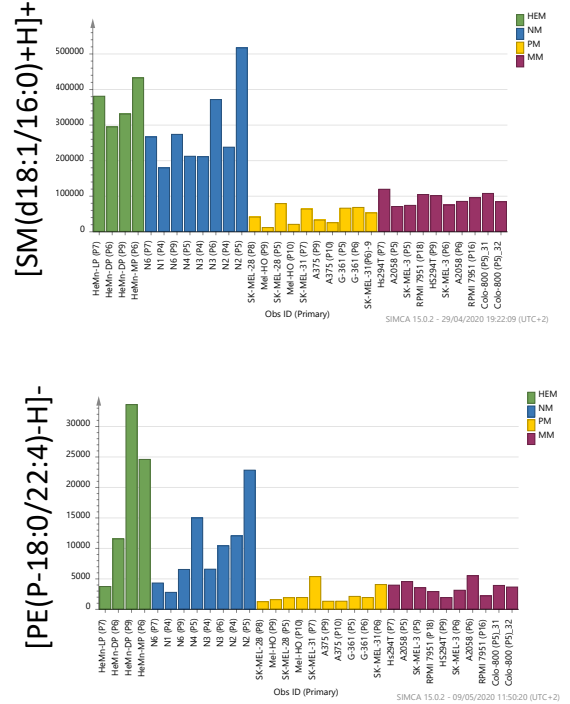

Figure S3

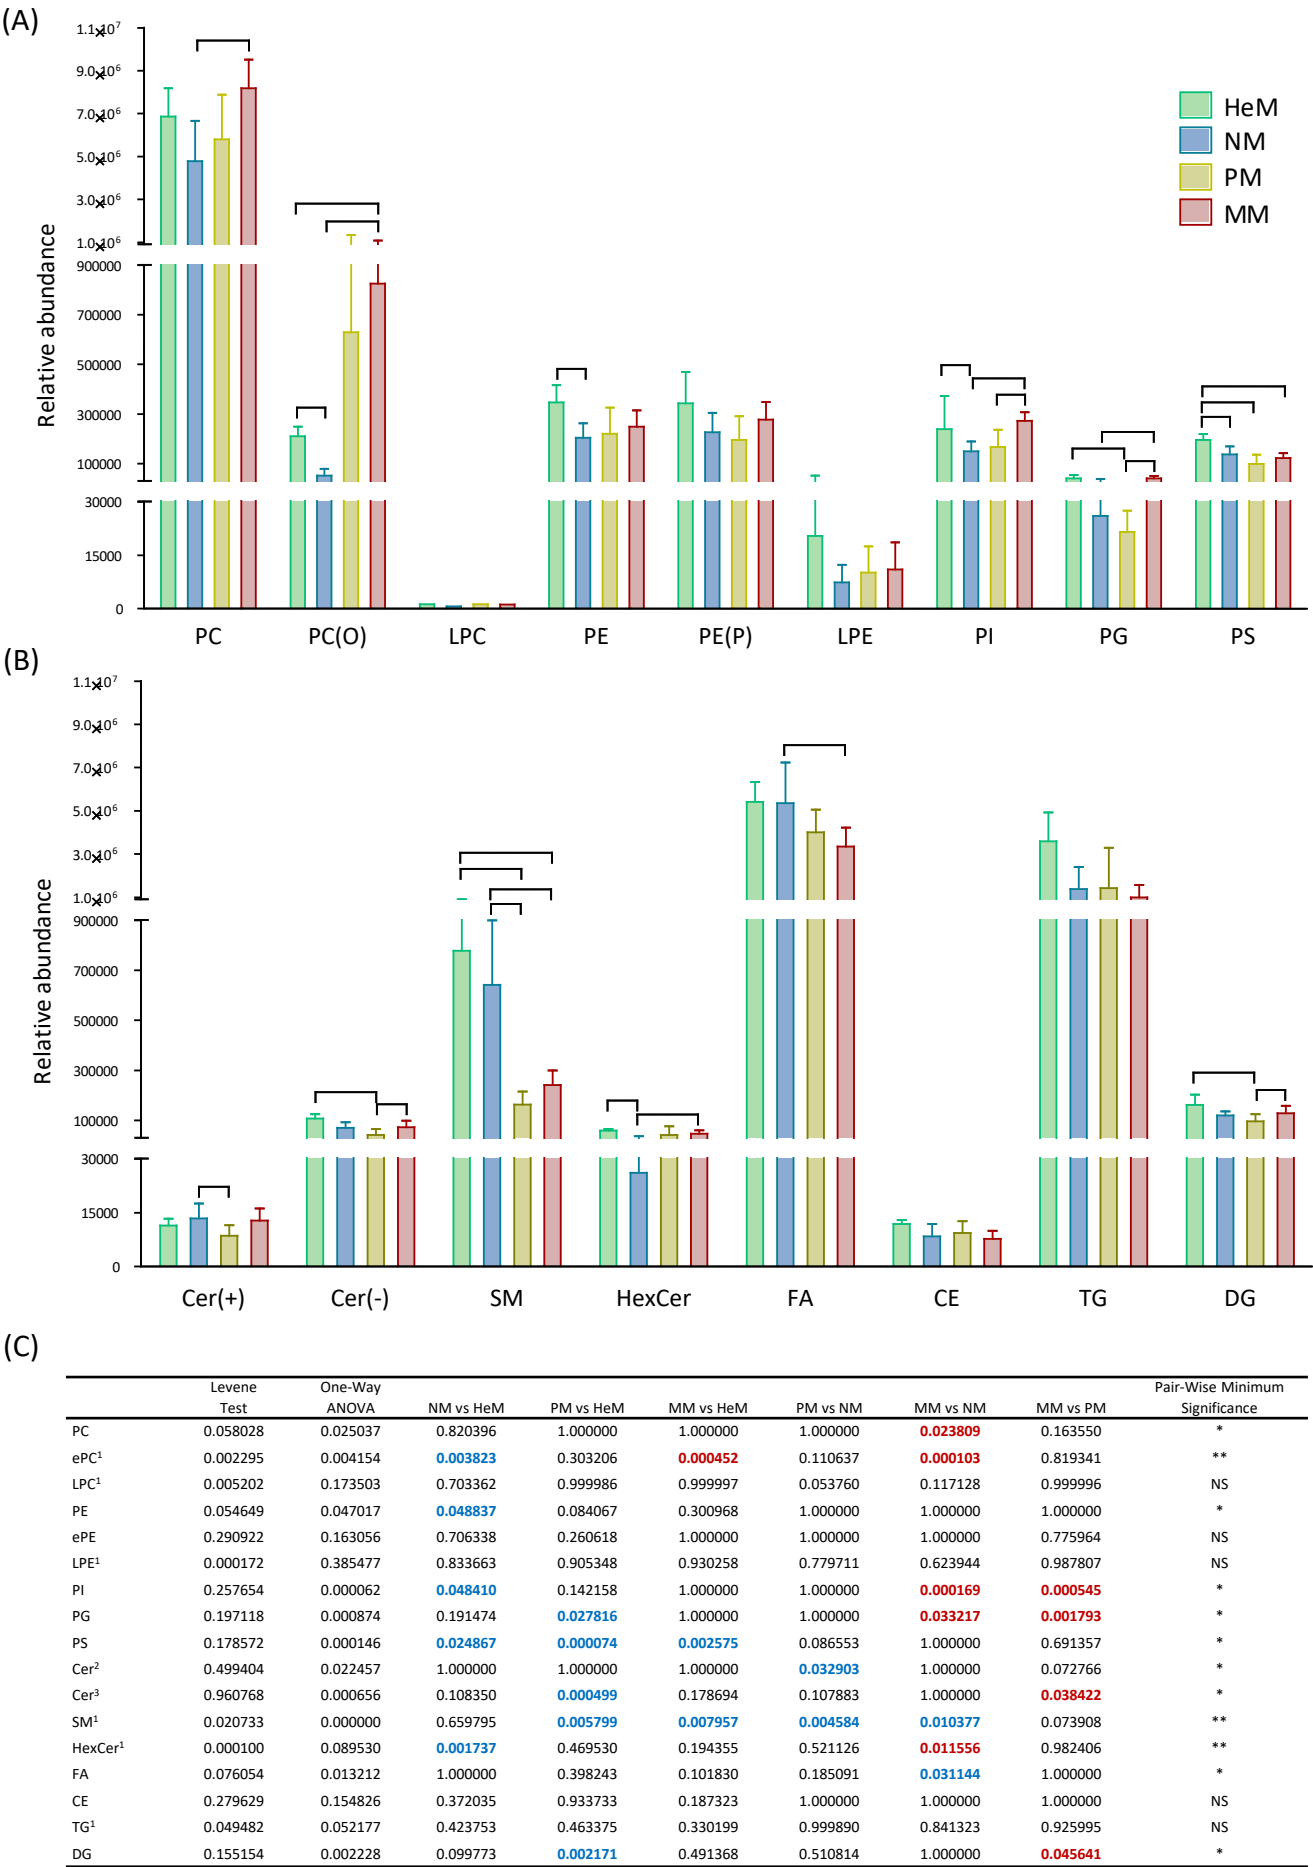

Figure S4

ESI+ MS/MS

C Spectrum

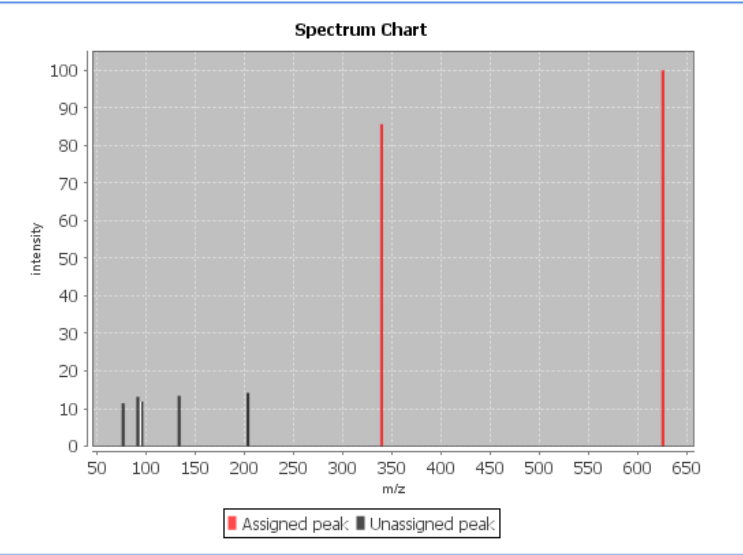

E

Match Lipid

| LipidIon          | M-Score | T-Score | Occ. | St. |
|-------------------|---------|---------|------|-----|
| PI(18:1_20:4)+NH4 | 14.9    | 0.4     | 74.4 |     |
| PI(20:4_18:1)+NH4 | 14.9    | 0.4     | 74.4 |     |
| PI(16:0_22:5)+NH4 | 4       | 0.4     | 40.1 |     |
| PI(16:1_22:4)+NH4 | 4       | 0.4     | 40.1 |     |
| PI(18:0_20:5)+NH4 | 4       | 0.4     | 40.1 |     |
| PI(20:3_18:2)+NH4 | 4       | 0.4     | 40.1 |     |
| PI(18:3_20:2)+NH4 | 4       | 0.4     | 40.1 |     |
| PI(18:4_20:1)+NH4 | 4       | 0.4     | 40.1 |     |
| PI(24:1_14:4)+NH4 | 4       | 0.4     | 40.1 |     |
| PI(24:2_14:3)+NH4 | 4       | 0.4     | 40.1 |     |
| PI(26:1_12:4)+NH4 | 4       | 0.4     | 40.1 |     |
| PI(27:1_11:4)+NH4 | 4       | 0.4     | 40.1 |     |
| PI(28:1_10:4)+NH4 | 4       | 0.4     | 40.1 |     |

Match Detail

| ObsMz    | Type | It. (%) | Frag.         | Delta(Da) |
|----------|------|---------|---------------|-----------|
| 95.086   | MS2  | 23.005  | -             | -         |
| 131.601  | MS2  | 20.418  | -             | -         |
| 135.1172 | MS2  | 20.065  | C10H15        | 0.0003    |
| 220.1337 | MS2  | 41.835  | -             | -         |
| 252.6568 | MS2  | 20.433  | -             | -         |
| 339.2893 | MS2  | 77.027  | MG(18:1)-OH   | -0.0001   |
| 530.7273 | MS2  | 17.41   | -             | -         |
| 625.5189 | MS2  | 100     | NL[PI,+NH4]+H | -0.0002   |

B Chromatogram

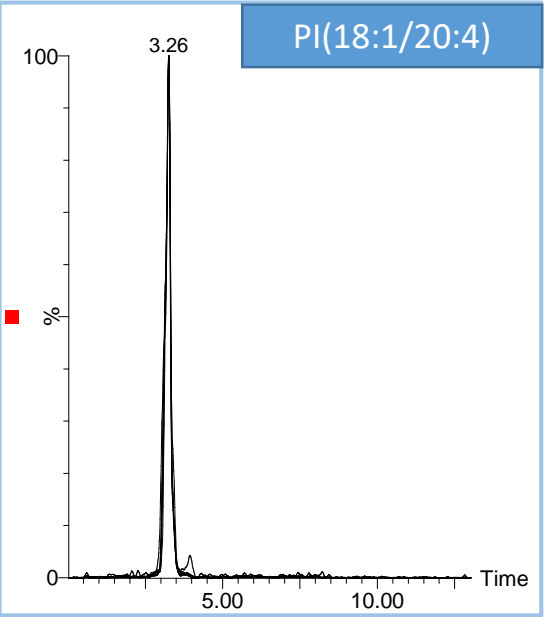

D Spectrum

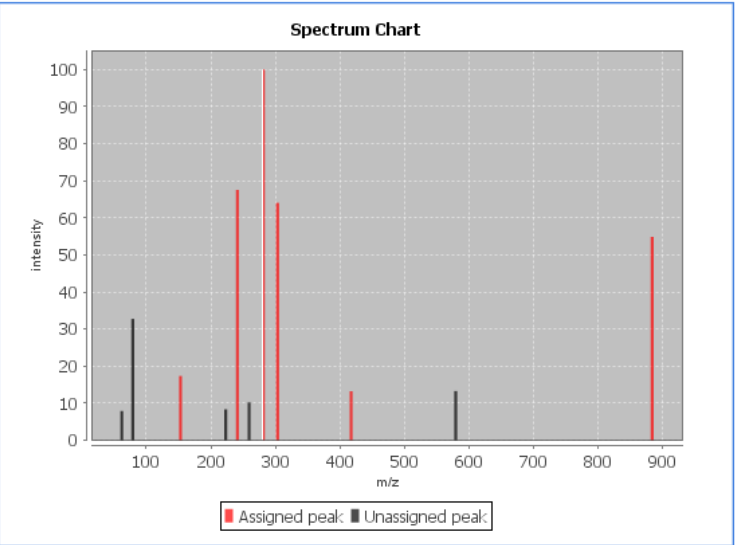

F

Match Lipid

| LipidIon        | M-Score | T-Score | Occ. | St. |
|-----------------|---------|---------|------|-----|
| PI(18:1_20:4)-H | 39.2    | 0.3     | 78.3 |     |
| PI(20:4_18:1)-H | 39.2    | 0.3     | 78.3 |     |
| PI(16:0_22:5)-H | 5.1     | 0.3     | 25.4 |     |
| PI(16:1_22:4)-H | 5.1     | 0.3     | 25.4 |     |
| PI(18:0_20:5)-H | 5.1     | 0.3     | 25.4 |     |
| PI(20:3_18:2)-H | 5.1     | 0.3     | 25.4 |     |
| PI(18:3_20:2)-H | 5.1     | 0.3     | 25.4 |     |
| PI(18:4_20:1)-H | 5.1     | 0.3     | 25.4 |     |
| PI(24:1_14:4)-H | 5.1     | 0.3     | 25.4 |     |
| PI(24:2_14:3)-H | 5.1     | 0.3     | 25.4 |     |
| PI(26:1_12:4)-H | 5.1     | 0.3     | 25.4 |     |
| PI(27:1_11:4)-H | 5.1     | 0.3     | 25.4 |     |
| PI(28:1_10:4)-H | 5.1     | 0.3     | 25.4 |     |

Match Detail

| ObsMz    | Type | It. (%) | Frag.              | Delta(Da) |
|----------|------|---------|--------------------|-----------|
| 78.9585  | MS2  | 27.457  | -                  | -         |
| 152.9949 | MS2  | 29.426  | -                  | -         |
| 155.3754 | MS2  | 7.525   | -                  | -         |
| 222.9988 | MS2  | 9.456   | -                  | -         |
| 241.0127 | MS2  | 66.512  | PH(inositol)-H2O-H | 0.0008    |
| 259.0237 | MS2  | 11.171  | IP                 | 0.0012    |
| 259.2409 | MS2  | 7.49    | -                  | -         |
| 281.2491 | MS2  | 100     | FA(18:1)-H         | 0.0005    |
| 303.2329 | MS2  | 66.748  | FA(20:4)-H         | -0.0001   |
| 317.9391 | MS2  | 7.931   | -                  | -         |
| 417.2424 | MS2  | 23.367  | LPA(18:1)-H3O      | 0.0012    |
| 579.3008 | MS2  | 10.309  | -                  | -         |
| 654.6499 | MS2  | 6.671   | -                  | -         |
| 883.5335 | MS2  | 77.781  | M-H                | -0.0007   |

Figure S5

PC  
sn2>sn1

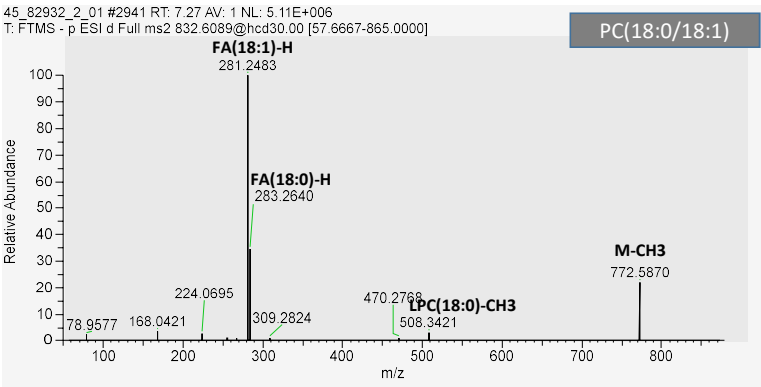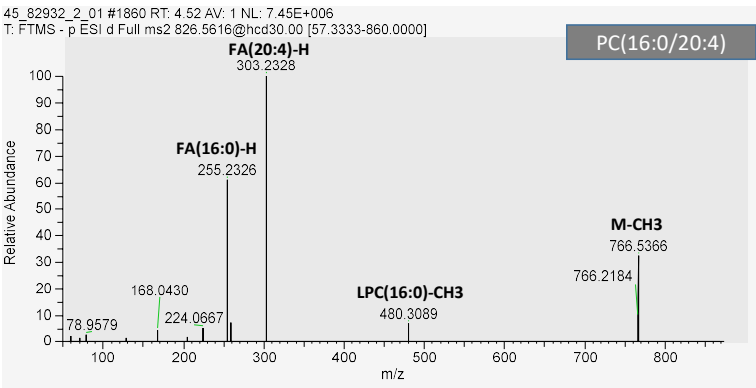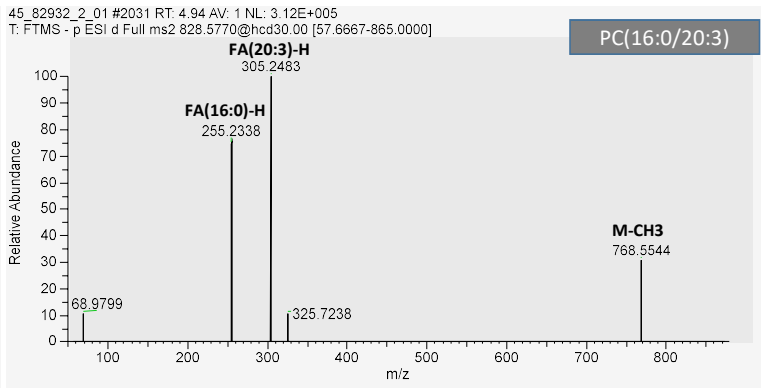

A: MS/MS spectra of the precursor ions of three representative PC species.

PE  
sn2>sn1

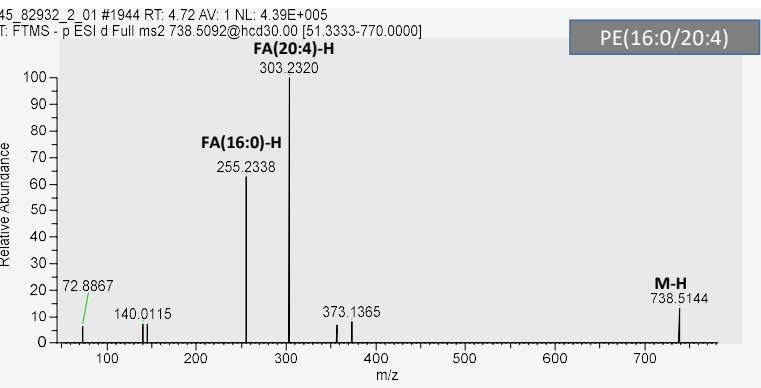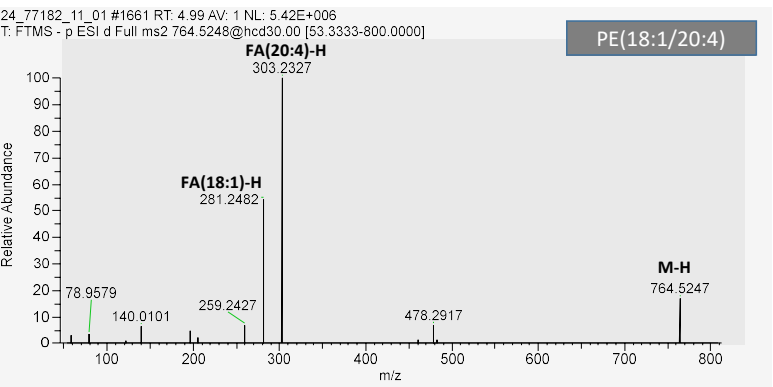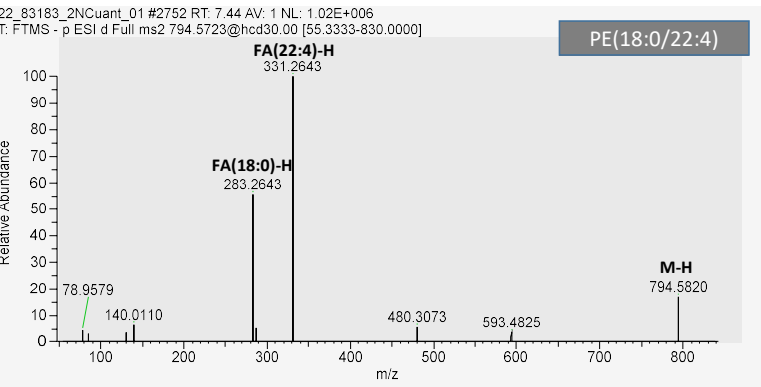

B: MS/MS spectra of the precursor ions of three representative PE species.



## PI sn1>sn2

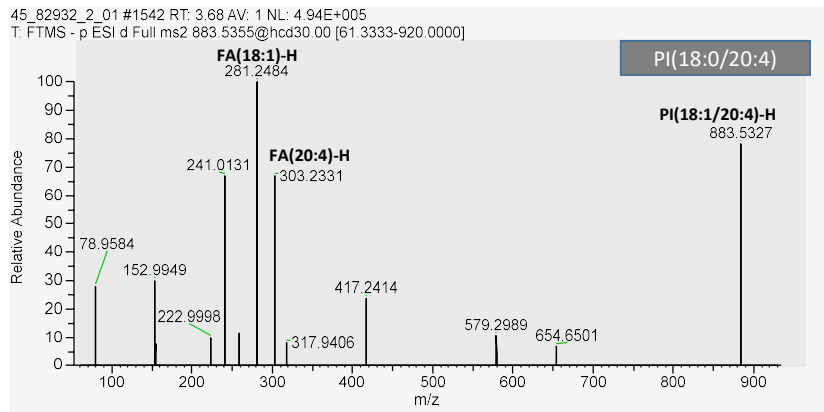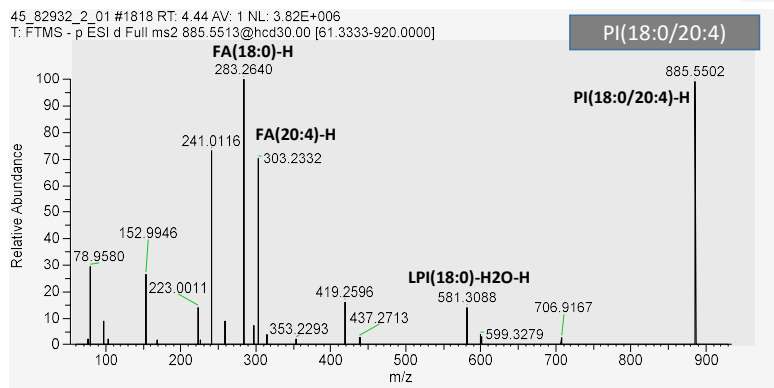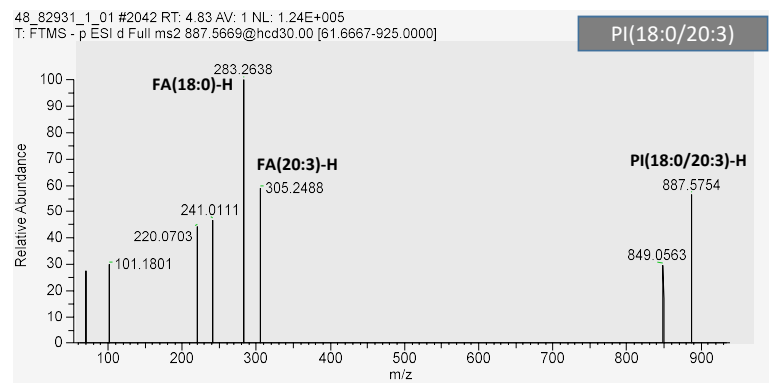

C: MS/MS spectra of the precursor ions of three representative PI species.

## PS sn1>sn2

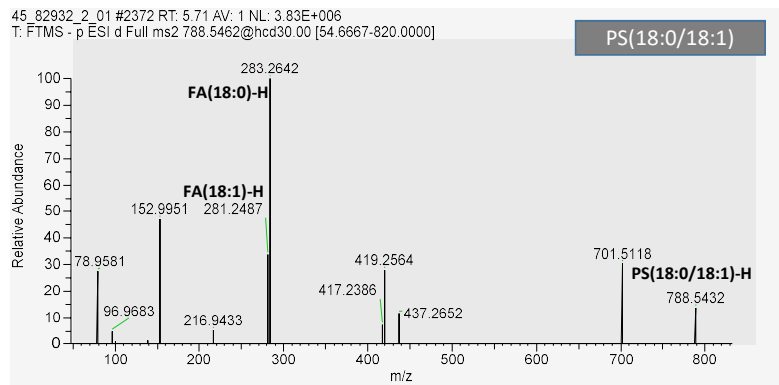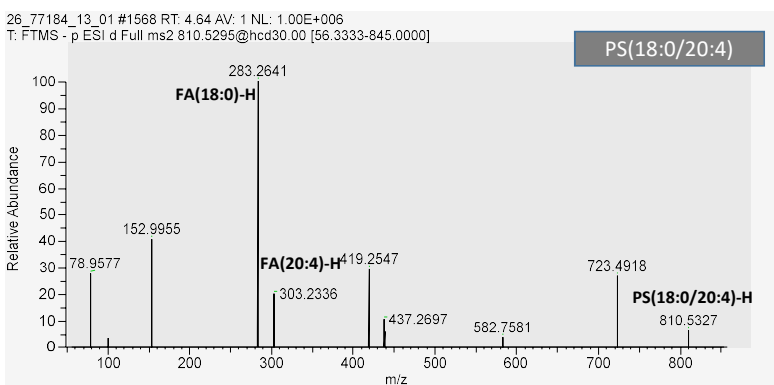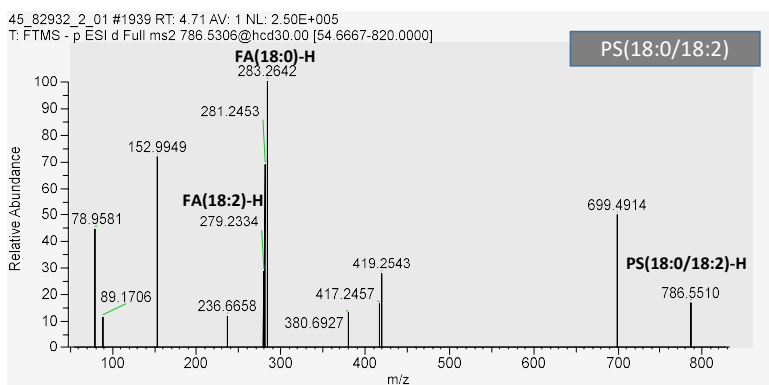

D: MS/MS spectra of the precursor ions of three representative PS species.

**PG**  
**sn1>sn2**

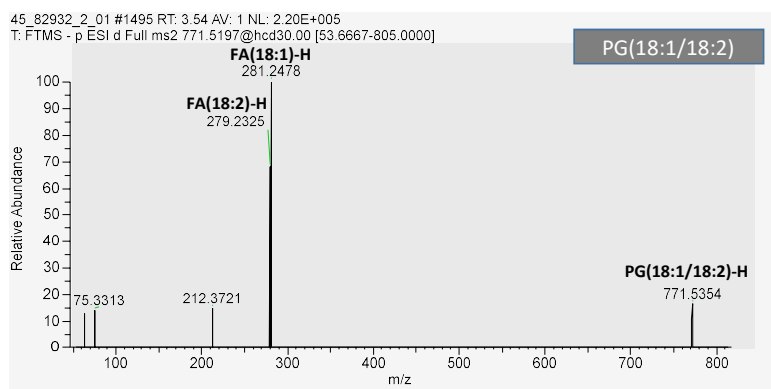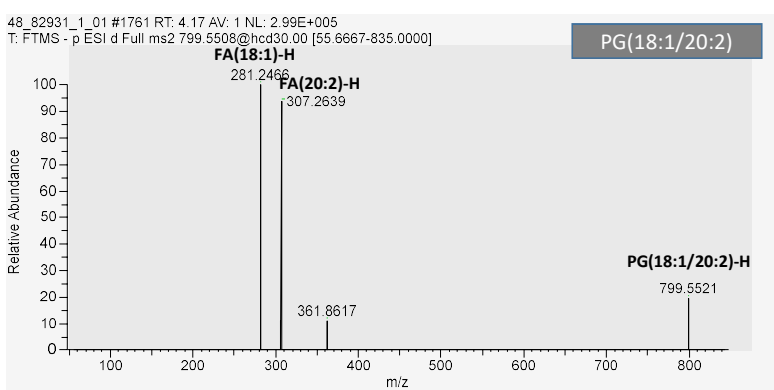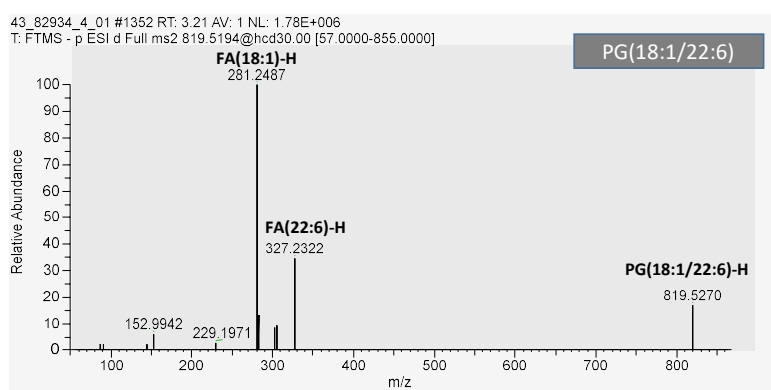

E: MS/MS spectra of the precursor ions of three representative PG species.
